# Supplementary material
Source: ML conference proceedings conference paper supplement (https://openreview.net/forum?id=5MG5C5aS6m)
Supplement: supplementary_material [file attachment]

---

**Algorithm 4:** Find a path  $\{W_{\mu_k}\}$  via a particular scheduling for  $\mu_k$  when  $a$  is unknown.

---

**Input:**  $\mu_0 \in \left[\frac{a^2}{4(a^2+1)^3}, \frac{a^2}{4}\right)$ ,  $\varepsilon > 0$

**Output:**  $\{W_{\mu_k}\}_{k=0}^\infty$

```

1  $\hat{a} \leftarrow \sqrt{4(\mu_0 + \varepsilon)}$  //  $\forall \varepsilon \geq 0$  s.t.  $\hat{a} < a$ 
2  $W_{\mu_0} \leftarrow \text{GradientFlow}(g_{\mu_0}, 0)$ 
3 for  $k = 1, 2, \dots$  do
4   | Let  $\mu_{k+1} \in \left[(2/\hat{a})^{2/3} \mu_k^{4/3}, \mu_k\right)$ 
5   |  $W_{\mu_{k+1}} \leftarrow \text{GradientFlow}(g_{\mu_{k+1}}, W_{\mu_k})$ 
6 end
7 return  $\{W_{\mu_k}\}_{k=0}^\infty$ 

```

---

## A Practical Implementation of Algorithm 2

We present a practical implementation of our homotopy algorithm in Algorithm 4. The updating scheme for  $\mu_k$  is now independent of the parameter  $a$ , but as presented, the initialization for  $\mu_0$  still depends on  $a$ . This is for the following reason: It is possible to make the updating scheme independent of  $a$  without imposing any additional assumptions on  $a$ , as evidenced by Lemma 4 below. The initialization for  $\mu_0$ , however, is trickier, and we must consider two separate cases:

1. *No assumptions on  $a$ .* In this case, if  $a$  is too small, then the problem becomes harder and the initial choice of  $\mu_0$  matters.
2. *Lower bound on  $a$ .* If we are willing to accept a lower bound on  $a$ , then there is an initialization for  $\mu_0$  that does not depend on  $a$ .

In Corollary 1, we illustrate this last point with the additional condition that  $a > \sqrt{5/27}$ . This essentially amounts to an assumption on the minimum signal, and is quite standard in the literature on learning SEM.

**Lemma 4.** Under the assumption  $\frac{a^2}{4(a^2+1)^3} \leq \mu_0 < \frac{a^2}{4}$ , the Algorithm 4 outputs the global optimal solution to (6), i.e.

$$\lim_{k \rightarrow \infty} W_{\mu_k} = W_G.$$

It turns out that the assumption in Lemma 4 is not overly restrictive, as there exist pre-determined sequences of  $\{\mu_k\}_{k=0}^\infty$  that can ensure the effectiveness of Algorithm 4 for any values of  $a$  greater than a certain threshold.

## B From Population Loss to Empirical Loss

The transformation from population loss to empirical can be thought from two components. First, with a given empirical loss, Algorithms 2 and 3 still achieve the global minimum,  $W_G$ , of problem 6, but now the output from the Algorithm is an empirical estimator  $\hat{a}$ , rather than ground truth  $a$ . Theorem 1 and Corollary 1 would continue to be valid. Second, the global optimum,  $W_G$ , of the empirical loss possess the same DAG structure as the underlying  $W_*$ . The finite-sample findings in Section 5 (specifically, Lemmas 18 and 19) of Loh and Bühlmann [31], which offer sufficient conditions on the sample size to ensure that the DAG structures of  $W_G$  and  $W_*$  are identical.

## C From Continuous to Discrete: Gradient Descent

Previously, gradient flow was employed to address the intermediate problem (7), a method that poses implementation challenges in a computational setting. In this section, we introduce Algorithm 6 that leverages gradient descent to solve (7) in each iteration. This adjustment serves practical considerations. We start with the convergence results of Gradient Descent.

**Definition 1.**  $f$  is  $L$ -smooth, if  $f$  is differentiable and  $\forall x, y \in \text{dom}(f)$  such that  $\|\nabla f(x) - \nabla f(y)\|_2 \leq L\|x - y\|_2$ .

---

**Algorithm 5:** Gradient Descent( $f, \eta, W_0, \epsilon$ )

---

**Input:** function  $f$ , step size  $\eta$ , initial point  $W_0$ , tolerance  $\epsilon$ **Output:**  $W_t$ 

```
1  $t \leftarrow 0$ 
2 while  $\|\nabla f(W_t)\|_2 > \epsilon$  do
3    $W_{t+1} \leftarrow W_t - \eta \nabla f(W_t)$ 
4    $t \leftarrow t + 1$ 
5 end
```

---

---

**Algorithm 6:** Homotopy algorithm using gradient descent for solving (1).

---

**Input:** Initial  $W_{-1} = W(x_{-1}, y_{-1})$ ,  $\mu_0 \in \left[ \frac{a^2}{4(a^2+1)^3} \frac{(1+\beta)^4}{(1-\beta)^2}, \frac{a^2}{4} \frac{(1-\delta)^3(1-\beta)^4}{(1+\beta)^2} \right)$ ,

$$\eta_0 = \frac{1}{\mu_0(a^2+1)+3a^2}, \epsilon_0 = \min\{\beta a \mu_0, \mu_0^{3/2}\}$$

**Output:**  $\{W_{\mu_k}\}_{k=0}^\infty$ 

```
1  $W_{\mu_0, \epsilon_0} \leftarrow \text{Gradient Descent}(g_{\mu_0}, \eta_0, W_{-1}, \epsilon_0)$ 
2 for  $k = 1, 2, \dots$  do
3   Let  $\mu_k = (2\mu_{k-1}^2)^{2/3} \frac{(a+\epsilon_{k-1}/\mu_{k-1})^{2/3}}{(a-\epsilon_{k-1}/\mu_{k-1})^{4/3}}$ 
4   Let  $\eta_k = \frac{1}{\mu_k(a^2+1)+3a^2}$ 
5   Let  $\epsilon_k = \min\{\beta a \mu_k, \mu_k^{3/2}\}$ 
6    $W_{\mu_k, \epsilon_k} \leftarrow \text{Gradient Descent}(g_{\mu_k}, \eta_k, W_{\mu_{k-1}}, \epsilon_k)$ 
7 end
```

---

441 **Theorem 3** (Nesterov et al. [33]). If function  $f$  is  $L$ -smooth, then Gradient Descent (Algorithm 5) with  
442 step size  $\eta = 1/L$ , finds an  $\epsilon$ -first-order stationary point (i.e.  $\|\nabla f(x)\|_2 \leq \epsilon$ ) in  $2L(f(x^0) - f^*)/\epsilon^2$   
443 iterations.

444 One of the pivotal factors influencing the convergence of gradient descent is the selection of the step  
445 size. Theorem 3 select a step size  $\eta = \frac{1}{L}$ . Therefore, our initial step is to determine the smoothness  
446 of  $g_\mu(W)$  within our region of interest,  $A = \{0 \leq x \leq a, 0 \leq y \leq \frac{a}{a^2+1}\}$ .

447 **Lemma 5.** Consider the function  $g_\mu(W)$  as defined in Equation 7 within the region  $A = \{0 \leq x \leq$   
448  $a, 0 \leq y \leq \frac{a}{a^2+1}\}$ . It follows that for all  $\mu \geq 0$ , the function  $g_\mu(W)$  is  $\mu(a^2 + 1) + 3a^2$ -smooth.

449 Since gradient descent is limited to identifying the  $\epsilon$  stationary point of the function. Thus, we study  
450 the gradient of  $g_\mu(W) = \mu f(W) + h(W)$ , i.e.  $\nabla g_\mu(W)$  has the following form

$$\nabla g_\mu(W) = \begin{pmatrix} \mu(x-a) + y^2x \\ \mu(a^2+1)y - a\mu + yx^2 \end{pmatrix}$$

451 As gradient descent is limited to identifying the  $\epsilon$  stationary point of the function, we, therefore, focus  
452 on  $\|\nabla g_\mu(W)\|_2 \leq \epsilon$ . This can be expressed in the subsequent manner:

$$\|\nabla g_\mu(W)\|_2 \leq \epsilon \Rightarrow -\epsilon \leq \mu(x-a) + y^2x < \epsilon \quad \text{and} \quad -\epsilon \leq \mu(a^2+1)y - a\mu + yx^2 \leq \epsilon$$

453 As a result,

$$\{(x, y) \mid \|\nabla g_\mu(W)\|_2 \leq \epsilon\} \subseteq \{(x, y) \mid \frac{\mu a - \epsilon}{\mu + y^2} \leq x \leq \frac{\mu a + \epsilon}{\mu + y^2}, \frac{\mu a - \epsilon}{x^2 + \mu(a^2+1)} \leq y \leq \frac{\mu a + \epsilon}{x^2 + \mu(a^2+1)}\}$$

454 Here we denote such region as  $A_{\mu, \epsilon}$

$$A_{\mu, \epsilon} = \{(x, y) \mid \frac{\mu a - \epsilon}{\mu + y^2} \leq x \leq \frac{\mu a + \epsilon}{\mu + y^2}, \frac{\mu a - \epsilon}{x^2 + \mu(a^2+1)} \leq y \leq \frac{\mu a + \epsilon}{x^2 + \mu(a^2+1)}\} \quad (10)$$

455 Figure 6 and 7 illustrate the region  $A_{\mu, \epsilon}$ .

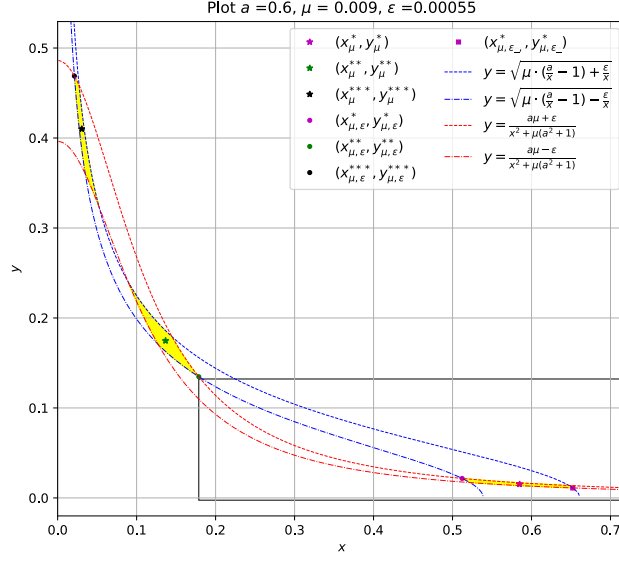

Figure 6: An example of  $A_{\mu, \epsilon}$  is depicted for  $a = 0.6$ ,  $\mu = 0.009$ , and  $\epsilon = 0.00055$ . The yellow region signifies  $\epsilon$  stationary points, denoted as  $A_{\mu, \epsilon}$  and defined by Equation (10).  $A_{\mu, \epsilon}$  is the disjoint union of  $A_{\mu, \epsilon}^1$  and  $A_{\mu, \epsilon}^2$ , which are defined by Equations (21) and (22), respectively.

456

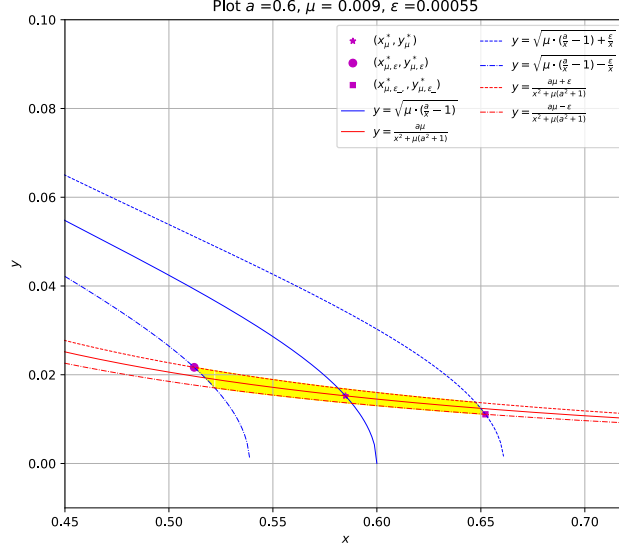

Figure 7: Here is a localized illustration of  $A_{\mu, \epsilon}$  that includes the point  $(x_{\mu}^*, y_{\mu}^*)$ . This region, referred to as  $A_{\mu, \epsilon}^1$ , is defined in Equation (21).

457

458 Given that the gradient descent can only locate  $\epsilon$  stationary points within the region  $A_{\mu, \epsilon}$  during  
 459 each iteration, the boundary of  $A_{\mu, \epsilon}$  becomes a critical component of our analysis. To facilitate clear  
 460 presentation, it is essential to establish some pertinent notations.

$$\begin{cases} x = \frac{\mu a}{\mu + y^2} \\ y = \frac{\mu a}{\mu(a^2 + 1) + x^2} \end{cases} \quad (11a)$$

$$\begin{cases} x = \frac{\mu a}{\mu + y^2} \\ y = \frac{\mu a}{\mu(a^2 + 1) + x^2} \end{cases} \quad (11b)$$

If the system of equations yields only a single solution, we denote this solution as  $(x_\mu^*, y_\mu^*)$ . If it yields two solutions, these solutions are denoted as  $(x_\mu^*, y_\mu^*), (x_\mu^{**}, y_\mu^{**})$ , with  $x_\mu^{**} < x_\mu^*$ . In the event that there are three distinct solutions to the system of equations, these solutions are denoted as  $(x_\mu^*, y_\mu^*), (x_\mu^{**}, y_\mu^{**}), (x_\mu^{***}, y_\mu^{***})$ , where  $x_\mu^{***} < x_\mu^{**} < x_\mu^*$ .

$$\begin{cases} x = \frac{\mu a - \epsilon}{\mu + y^2} \\ y = \frac{\mu a + \epsilon}{\mu(a^2 + 1) + x^2} \end{cases} \quad (12a)$$

$$\begin{cases} x = \frac{\mu a - \epsilon}{\mu + y^2} \\ y = \frac{\mu a + \epsilon}{\mu(a^2 + 1) + x^2} \end{cases} \quad (12b)$$

If the system of equations yields only a single solution, we denote this solution as  $(x_{\mu,\epsilon}^*, y_{\mu,\epsilon}^*)$ . If it yields two solutions, these solutions are denoted as  $(x_{\mu,\epsilon}^*, y_{\mu,\epsilon}^*), (x_{\mu,\epsilon}^{**}, y_{\mu,\epsilon}^{**})$ , with  $x_{\mu,\epsilon}^{**} < x_{\mu,\epsilon}^*$ . In the event that there are three distinct solutions to the system of equations, these solutions are denoted as  $(x_{\mu,\epsilon}^*, y_{\mu,\epsilon}^*), (x_{\mu,\epsilon}^{**}, y_{\mu,\epsilon}^{**}), (x_{\mu,\epsilon}^{***}, y_{\mu,\epsilon}^{***})$ , where  $x_{\mu,\epsilon}^{***} < x_{\mu,\epsilon}^{**} < x_{\mu,\epsilon}^*$ .

$$\begin{cases} x = \frac{\mu a + \epsilon}{\mu + y^2} \\ y = \frac{\mu a - \epsilon}{\mu(a^2 + 1) + x^2} \end{cases} \quad (13a)$$

$$\begin{cases} x = \frac{\mu a + \epsilon}{\mu + y^2} \\ y = \frac{\mu a - \epsilon}{\mu(a^2 + 1) + x^2} \end{cases} \quad (13b)$$

If the system of equations yields only a single solution, we denote this solution as  $(x_{\mu,\epsilon_-}^*, y_{\mu,\epsilon_-}^*)$ . If it yields two solutions, these solutions are denoted as  $(x_{\mu,\epsilon_-}^*, y_{\mu,\epsilon_-}^*), (x_{\mu,\epsilon_-}^{**}, y_{\mu,\epsilon_-}^{**})$ , with  $x_{\mu,\epsilon_-}^{**} < x_{\mu,\epsilon_-}^*$ . In the event that there are three distinct solutions to the system of equations, these solutions are denoted as  $(x_{\mu,\epsilon_-}^*, y_{\mu,\epsilon_-}^*), (x_{\mu,\epsilon_-}^{**}, y_{\mu,\epsilon_-}^{**}), (x_{\mu,\epsilon_-}^{***}, y_{\mu,\epsilon_-}^{***})$ , where  $x_{\mu,\epsilon_-}^{***} < x_{\mu,\epsilon_-}^{**} < x_{\mu,\epsilon_-}^*$ .

**Remark 4.** *There always exists at least one solution to the above system of equations. When  $\mu$  is sufficiently small, the above system of equations always yields three solutions, as demonstrated in Theorem 5 and Theorem 9*

The parameter  $\epsilon$  can substantially influence the behavior of the systems of equations (12a), (12b) and (13a), (13b). A crucial consideration is to ensure that  $\epsilon$  remains adequately small. To facilitate this, we introduce a new parameter,  $\beta$ , whose specific value will be determined later. At this stage, we merely require that  $\beta$  should lie within the interval  $(0, 1)$ . We further impose a constraint on  $\epsilon$  to satisfy the following inequality:

$$\epsilon \leq \beta a \mu \quad (14)$$

Following the same procedure when we deal with  $\epsilon = 0$ . Let us substitute (12a) into (12b), then we obtain an equation that only involves the variable  $y$

$$r_\epsilon(y; \mu) = \frac{a + \epsilon/\mu}{y} - (a^2 + 1) - \frac{(\mu a - \epsilon)^2/\mu}{(y^2 + \mu)^2} \quad (15)$$

Let us substitute (12b) into (12a), then we obtain an equation that only involves the variable  $x$

$$t_\epsilon(x; \mu) = \frac{a - \epsilon/\mu}{x} - 1 - \frac{(\mu a + \epsilon)^2/\mu}{(\mu(a^2 + 1) + x^2)^2} \quad (16)$$

Proceed similarly for equations (13a) and (13b).

$$r_{\epsilon_-}(y; \mu) = \frac{a - \epsilon/\mu}{y} - (a^2 + 1) - \frac{(\mu a + \epsilon)^2/\mu}{(y^2 + \mu)^2} \quad (17)$$

$$t_{\epsilon_-}(x; \mu) = \frac{a + \epsilon/\mu}{x} - 1 - \frac{(\mu a - \epsilon)^2/\mu}{(\mu(a^2 + 1) + x^2)^2} \quad (18)$$

Given the substantial role that the system of equations (12a) and (12b) play in our analysis, the existence of  $\epsilon$  in these equations complicates the analysis, this can be avoided by considering the worst-case scenario, i.e., when  $\epsilon = \beta a \mu$ . With this particular choice of  $\epsilon$ , we can reformulate (15) and (16) as follows, denoting them as  $r_{\beta}(y; \epsilon)$  and  $r_{\beta}(x; \epsilon)$  respectively.

$$r_{\beta}(y; \mu) = \frac{a(1 + \beta)}{y} - (a^2 + 1) - \frac{\mu a^2(1 - \beta)^2}{(y^2 + \mu)^2} \quad (19)$$

$$t_{\beta}(x; \mu) = \frac{a(1 - \beta)}{x} - 1 - \frac{\mu a^2(1 + \beta)^2}{(\mu(a^2 + 1) + x^2)^2} \quad (20)$$

The functions  $r_{\epsilon}(y; \mu)$ ,  $r_{\epsilon_-}(y; \mu)$ , and  $r_{\beta}(y; \mu)$  possess similar properties to  $r(y; \mu)$  as defined in Equation (8), with more details available in Theorem 7 and 8. Additionally, the functions  $t_{\epsilon}(x; \mu)$ ,  $t_{\epsilon_-}(x; \mu)$ , and  $t_{\beta}(x; \mu)$  share similar characteristics with  $t(x; \mu)$  as defined in Equation (9), with more details provided in Theorem 9.

As illustrated in Figure 6, the  $\epsilon$ -stationary point region  $A_{\mu, \epsilon}$  can be partitioned into two distinct areas, of which only the lower-right one contains  $(x_{\mu, \epsilon}^*, y_{\mu, \epsilon}^*)$  and it is of interest to our analysis. Moreover,  $(x_{\mu, \epsilon}^*, y_{\mu, \epsilon}^*)$  and  $(x_{\mu, \epsilon}^{**}, y_{\mu, \epsilon}^{**})$  are extremal point of two distinct regions. The upcoming corollary substantiates this intuition.

**Corollary 3.** If  $\mu < \tau$  ( $\tau$  is defined in Theorem 5(v)), assume  $\epsilon$  satisfies (14),  $\beta$  satisfies  $\left(\frac{1+\beta}{1-\beta}\right)^2 \leq a^2 + 1$ , systems of equations (12a), (12b) at least have two solutions. Moreover,  $A_{\mu, \epsilon} = A_{\mu, \epsilon}^1 \cup A_{\mu, \epsilon}^2$

$$A_{\mu, \epsilon}^1 = A_{\mu, \epsilon} \cap \{(x, y) \mid x \geq x_{\mu, \epsilon}^*, y \leq y_{\mu, \epsilon}^*\} \quad (21)$$

$$A_{\mu, \epsilon}^2 = A_{\mu, \epsilon} \cap \{(x, y) \mid x \leq x_{\mu, \epsilon}^{**}, y \geq y_{\mu, \epsilon}^{**}\} \quad (22)$$

Corollary 3 suggests that  $A_{\mu, \epsilon}$  can be partitioned into two distinct regions, namely  $A_{\mu, \epsilon}^1$  and  $A_{\mu, \epsilon}^2$ . Furthermore, for every  $(x, y)$  belonging to  $A_{\mu, \epsilon}^1$ , it follows that  $x \geq x_{\mu, \epsilon}^*$  and  $y \leq y_{\mu, \epsilon}^*$ . Similarly, for every  $(x, y)$  that lies within  $A_{\mu, \epsilon}^2$ , the condition  $x \leq x_{\mu, \epsilon}^{**}$  and  $y \geq y_{\mu, \epsilon}^{**}$  holds. The region  $A_{\mu, \epsilon}^1$  represents the “correct” region that gradient descent should identify. In this context, identifying the region equates to pinpointing the extremal points of the region. As a result, our focus should be on the extremal points of  $A_{\mu, \epsilon}^1$  and  $A_{\mu, \epsilon}^2$ , specifically at  $(x_{\mu, \epsilon}^*, y_{\mu, \epsilon}^*)$  and  $(x_{\mu, \epsilon}^{**}, y_{\mu, \epsilon}^{**})$ . Furthermore, the key to ensuring the convergence of the gradient descent to the  $A_{\mu, \epsilon}^1$  is to accurately identify the “basin of attraction” of the region  $A_{\mu, \epsilon}^1$ . The following lemma provides a region within which, regardless of the initialization point of the gradient descent, it converges inside  $A_{\mu, \epsilon}^1$ .

**Lemma 6.** Assume  $\mu < \tau$  ( $\tau$  is defined in Theorem 5(v)),  $\left(\frac{1+\beta}{1-\beta}\right)^2 \leq a^2 + 1$ . Define  $B_{\mu, \epsilon} = \{(x, y) \mid x_{\mu, \epsilon}^{**} < x \leq a, 0 \leq y < y_{\mu, \epsilon}^{**}\}$ . Run Algorithm 5 with input  $f = g_{\mu}(x, y), \eta = \frac{1}{\mu(a^2 + 1) + 3a^2}, W_0 = (x(0), y(0))$ , where  $(x(0), y(0)) \in B_{\mu, \epsilon}$ , then after at most  $\frac{2(\mu(a^2 + 1) + 3a^2)(g_{\mu}(x(0), y(0)) - g_{\mu}(x_{\mu, \epsilon}^*, y_{\mu, \epsilon}^*))}{\epsilon^2}$  iterations,  $(x_t, y_t) \in A_{\mu, \epsilon}^1$ .

Lemma 6 can be considered the gradient descent analogue of Lemma 2. It plays a pivotal role in the proof of Theorem 4. In Figure 6, the lower-right rectangle corresponds to  $B_{\mu, \epsilon}$ . Lemma 6 implies that the gradient descent with any initialization inside  $B_{\mu_{k+1}, \epsilon_{k+1}}$  will converge to  $A_{\mu_{k+1}, \epsilon_{k+1}}^1$  at last. Then, by utilizing the previous solution  $W_{\mu_k, \epsilon_k}$  as the initial point, as long as it lies within region  $B_{\mu_{k+1}, \epsilon_{k+1}}$ , the gradient descent can converge to  $A_{\mu_{k+1}, \epsilon_{k+1}}^1$  which is  $\epsilon$  stationary points region that contains  $W_{\mu_{k+1}}^*$ , thereby achieving the goal of tracking  $W_{\mu_{k+1}}^*$ . Following the scheduling for  $\mu_k$  prescribed in Algorithm 6 provides a sufficient condition to ensure that will happen.

We now proceed to present the theorem which guarantees the global convergence of Algorithm 6.

524 **Theorem 4.** If  $\delta \in (0, 1)$ ,  $\beta \in (0, 1)$ ,  $\left(\frac{1+\beta}{1-\beta}\right)^2 \leq (1-\delta)(a^2+1)$ , and  $\mu_0$  satisfies

$$\frac{a^2}{4(a^2+1)^3} \leq \frac{a^2}{4(a^2+1)^3} \frac{(1+\beta)^4}{(1-\beta)^2} \leq \mu_0 \leq \frac{a^2}{4} \frac{(1-\delta)^3(1-\beta)^4}{(1+\beta)^2} \leq \frac{a^2}{4}$$

525 Set the updating rule

$$\begin{aligned} \epsilon_k &= \min\{\beta a \mu_k, \mu_k^{3/2}\} \\ \mu_{k+1} &= (2\mu_k^2)^{2/3} \frac{(a + \epsilon_k/\mu_k)^{2/3}}{(a - \epsilon_k/\mu_k)^{4/3}} \end{aligned}$$

526 Then  $\mu_{k+1} \leq (1-\delta)\mu_k$ . Moreover, for any  $\varepsilon_{\text{dist}} > 0$ , running Algorithm 6 after  $K(\mu_0, a, \delta, \varepsilon_{\text{dist}})$   
527 outer iteration

$$\|W_{\mu_k, \epsilon_k} - W_G\|_2 \leq \varepsilon_{\text{dist}} \quad (23)$$

528 where

$$K(\mu_0, a, \delta, \varepsilon_{\text{dist}}) \geq \frac{1}{\ln(1/(1-\delta))} \max \left\{ \ln \frac{\mu_0}{\beta^2 a^2}, \ln \frac{72\mu_0}{a^2(1-(1/2)^{1/4})}, \ln \left( \frac{3(4-\delta)\mu_0}{\varepsilon_{\text{dist}}^2} \right), \frac{1}{2} \ln \left( \frac{46656\mu_0^2}{a^2 \varepsilon_{\text{dist}}^2} \right), \frac{1}{3} \ln \left( \frac{46656\mu_0^3}{a^4 \varepsilon_{\text{dist}}^2} \right) \right\}$$

529 The total gradient descent steps are

$$\begin{aligned} & \sum_{k=0}^{K(\mu_0, a, \delta, \varepsilon_{\text{dist}})} \frac{2(\mu_k(a^2+1) + 3a^2)(g_{\mu_{k+1}}(W_{\mu_k, \epsilon_k}) - g_{\mu_{k+1}}(W_{\mu_{k+1}, \epsilon_{k+1}}))}{\epsilon_k^2} \\ & \leq 2(\mu_0(a^2+1) + 3a^2) \left( \frac{1}{\beta^6 a^6} + \left( \max \left\{ \frac{3(4-\delta)}{\varepsilon_{\text{dist}}^2}, \frac{216}{a \varepsilon_{\text{dist}}}, \left( \frac{216}{a \varepsilon_{\text{dist}}} \right)^{2/3}, \frac{1}{\beta^2 a^2}, \frac{72}{(1-(1/2)^{1/4})a^2} \right\} \right)^3 \right) g_{\mu_0}(W_{\mu_0}^{\epsilon_0}) \\ & \lesssim O(\mu_0 a^2 + a^2 + \mu_0) \left( \frac{1}{\beta^6 a^6} + \frac{1}{\varepsilon_{\text{dist}}^6} + \frac{1}{a^3 \varepsilon_{\text{dist}}^3} + \frac{1}{a^2 \varepsilon_{\text{dist}}^2} + \frac{1}{a^6} \right) \end{aligned}$$

530 *Proof.* Upon substituting gradient flow with gradient descent, it becomes possible to only identify an  
531  $\epsilon$ -stationary point for  $g_\mu(W)$ . This modification necessitates specifying the stepsize  $\eta$  for gradient  
532 descent, as well as an updating rule for  $\mu$ . The adjustment procedure used can substantially influence  
533 the result of Algorithm 6. In this proof, we will impose limitations on the update scheme  $\mu_k$ , the  
534 stepsize  $\eta_k$ , and the tolerance  $\epsilon_k$  to ensure their effective operation within Algorithm 6. The approach  
535 employed for this proof closely mirrors that of the proof for Theorem 1 albeit with more careful  
536 scrutiny. In this proof, we will work out all the requirements for  $\mu, \epsilon, \eta$ . Subsequently, we will verify  
537 that our selection in Theorem 4 conforms to these requirements.

538 In the proof, we occasionally use  $\mu, \epsilon$  or  $\mu_k, \epsilon_k$ . When we employ  $\mu, \epsilon$ , it signifies that the given  
539 inequality or equality holds for any  $\mu, \epsilon$ . Conversely, when we use  $\mu_k, \epsilon_k$ , it indicates we are  
540 examining how to set these parameters for distinct iterations.

541 **Establish the Bound**  $y_{\mu, \epsilon}^{**} \geq \sqrt{\mu}$  First, let us consider  $r_\epsilon(\sqrt{\mu}; \mu) \leq 0$ , i.e.

$$r_\epsilon(\sqrt{\mu}; \mu) = \frac{a + \epsilon/\mu}{\sqrt{\mu}} - (a^2 + 1) - \frac{\mu(a - \epsilon/\mu)^2}{4\mu^2} \leq 0$$

542 This is always true when  $\mu > 4/a^2$ , and we require

$$\epsilon \leq 2\mu^{3/2} + a\mu - 2\sqrt{2a\mu^{5/2} - \mu^3 a^2} \quad \text{when } \mu \leq \frac{4}{a^2}$$

543 Now we name it condition 1

**Condition 1.**

$$\epsilon \leq 2\mu^{3/2} + a\mu - 2\sqrt{2a\mu^{5/2} - \mu^3 a^2} \quad \text{when } \mu \leq \frac{4}{a^2}$$

544 Under the assumption that Condition 1 is satisfied. Since  $r_\epsilon(y; \mu)$  is increasing function with  
545 interval  $y \in [y_{\text{lb}, \epsilon}, y_{\text{ub}, \epsilon}]$ , and we know  $y_{\text{lb}, \epsilon} \leq \sqrt{\mu} \leq y_{\text{ub}, \epsilon}$  and based on Theorem 7(ii), we have  
546  $y_{\text{lb}, \epsilon} \leq y_{\mu, \epsilon}^{**} \leq y_{\text{ub}, \epsilon}$ ,  $r_\epsilon(\sqrt{\mu}; \mu) \leq r_\epsilon(y_{\mu, \epsilon}^{**}; \mu) = 0$ . Therefore,  $y_{\mu, \epsilon}^{**} \geq \sqrt{\mu}$ .

547 **Ensuring the Correct Solution Path via Gradient Descent** Following the argument when we  
 548 prove Theorem 1, we strive to ensure that the gradient descent, when initiated at  $(x_{\mu_k, \epsilon_k}, y_{\mu_k, \epsilon_k})$ , will  
 549 converge within the "correct"  $\epsilon_{k+1}$ -stationary point region (namely,  $\|\nabla g_{\mu_{k+1}}(W)\|_2 < \epsilon_{k+1}$ ) which  
 550 includes  $(x_{\mu_{k+1}}^*, y_{\mu_{k+1}}^*)$ . For this to occur, we necessitate that:

$$y_{\mu_{k+1}, \epsilon_{k+1}} \stackrel{(1)}{>} y_{\mu_{k+1}, \epsilon_{k+1}}^{**} \stackrel{(2)}{>} \sqrt{\mu_{k+1}} \stackrel{(3)}{\geq} (2\mu_k^2)^{1/3} \frac{(a + \epsilon_k/\mu_k)^{1/3}}{(a - \epsilon_k/\mu_k)^{2/3}} \stackrel{(4)}{>} y_{\mu_k, \epsilon_k}^* \stackrel{(5)}{>} y_{\mu_k, \epsilon_k} \quad (24)$$

551 Here (1), (5) are due to Corollary 3; (2) comes from the boundary we established earlier; (3) is  
 552 based on the constraints we have placed on  $\mu_k$  and  $\mu_{k+1}$ , which we will present as Condition 2  
 553 subsequently; (4) is from the Theorem 7(ii) and relationship  $y_{\mu_k, \epsilon_k}^* < y_{\text{lb}, \mu_k, \epsilon_k}$ . Also, from the  
 554 Lemma 9,  $\max_{\mu \leq \tau} x_{\mu, \epsilon}^{**} \leq \min_{\mu > 0} x_{\mu, \epsilon}^*$ . Hence, by invoking Lemma 6, we can affirm that our  
 555 gradient descent consistently traces the correct stationary point. Now we state condition to make it  
 556 happen,

**Condition 2.**

$$(1 - \delta)\mu_k \geq \mu_{k+1} \geq (2\mu_k^2)^{2/3} \frac{(a + \epsilon_k/\mu_k)^{2/3}}{(a - \epsilon_k/\mu_k)^{4/3}}$$

557 In this context, our requirement extends beyond merely ensuring that  $\mu_k$  decreases. We further  
 558 stipulate that it should decrease by a factor of  $1 - \delta$ . Next, we impose another important constraint

**Condition 3.**

$$\epsilon_k \leq \mu_k^{3/2}$$

559 **Updating Rules** Now we are ready to check our updating rules satisfy the conditions above

$$\begin{aligned} \epsilon_k &= \min\{\beta a \mu_k, \mu_k^{3/2}\} \\ \mu_{k+1} &= (2\mu_k^2)^{2/3} \frac{(a + \epsilon_k/\mu_k)^{2/3}}{(a - \epsilon_k/\mu_k)^{4/3}} \end{aligned}$$

560 **Check for Conditions** First, we check the condition 2, condition 2 requires

$$(1 - \delta)\mu_k \geq (2\mu_k^2)^{2/3} \frac{(a + \epsilon_k/\mu_k)^{2/3}}{(a - \epsilon_k/\mu_k)^{4/3}} \Rightarrow \mu_k \frac{(a + \epsilon_k/\mu_k)^2}{(a - \epsilon_k/\mu_k)^4} \leq \frac{(1 - \delta)^3}{4}$$

561 Note that  $\epsilon_k \leq \beta a \mu_k < a \mu_k$

$$\mu_k \frac{(a + \epsilon_k/\mu_k)^2}{(a - \epsilon_k/\mu_k)^4} \leq \mu_k \frac{(1 + \beta)^2}{(1 - \beta)^4} \frac{1}{a^2}$$

562 Therefore, once the following inequality is true, Condition 2 is satisfied.

$$\mu_k \frac{(1 + \beta)^2}{(1 - \beta)^4} \frac{1}{a^2} \leq \frac{(1 - \delta)^3}{4} \Rightarrow \mu_k \leq \frac{a^2 (1 - \delta)^3 (1 - \beta)^4}{4 (1 + \beta)^2}$$

563 Because  $\mu_k \leq \mu_0 \leq \frac{a^2 (1 - \delta)^3 (1 - \beta)^4}{4 (1 + \beta)^2}$  from the condition we impose for  $\mu_0$ . Consequently, Condition  
 564 2 is satisfied under our choice of  $\epsilon_k$ .

565 Now we focus on the Condition 1. Because  $\epsilon_k \leq a\beta\mu_k$ , if we can ensure  $a\beta\mu_k \leq 2\mu_k^{3/2} + a\mu_k -$   
 566  $2\sqrt{2a\mu_k^{5/2} - \mu_k^3 a^2}$  holds, then we can show Condition 1 is always satisfied.

$$\begin{aligned} a\beta\mu_k &\leq 2\mu_k^{3/2} + a\mu_k - 2\sqrt{2a\mu_k^{5/2} - \mu_k^3 a^2} \\ 2\sqrt{2a\mu_k^{5/2} - \mu_k^3 a^2} &\leq 2\mu_k^{3/2} + (1 - \beta)a\mu_k \\ 4(2a\mu_k^{5/2} - \mu_k^3 a^2) &\leq 4\mu_k^3 + (1 - \beta)^2 a^2 \mu_k^2 + 4(1 - \beta)a\mu_k^{5/2} \\ 0 &\leq 4(a^2 + 1)\mu_k^3 + (1 - \beta)^2 a^2 \mu_k^2 - 4(1 + \beta)a\mu_k^{5/2} \\ 0 &\leq 4(a^2 + 1)\mu_k - 4(1 + \beta)a\mu_k^{1/2} + (1 - \beta)^2 a^2 \quad \text{when } 0 \leq \mu_k \leq 4/a^2 \\ 0 &\leq \mu_k - \frac{(1 + \beta)a}{(a^2 + 1)} \mu_k^{1/2} + \frac{(1 - \beta)^2 a^2}{4(a^2 + 1)} \end{aligned}$$

567 We also notice that

$$\frac{(1+\beta)^2 a^2}{(a^2+1)^2} - 4 \frac{(1-\beta)^2 a^2}{4(a^2+1)} \leq 0 \Leftrightarrow \left( \frac{1+\beta}{1-\beta} \right)^2 \leq a^2 + 1$$

568 Because  $\left( \frac{1+\beta}{1-\beta} \right)^2 \leq (1-\delta)(a^2+1)$ , the inequality above always holds and this inequality implies  
569 that for any  $\mu_k \geq 0$

$$0 \leq \mu_k - \frac{(1+\beta)a}{(a^2+1)} \mu_k^{1/2} + \frac{(1-\beta)^2 a^2}{4(a^2+1)}$$

570 Therefore, Condition [2](#) holds. Condition [3](#) also holds because of the choice of  $\epsilon_k$ .

571 **Bound the Distance** Let  $c = 72/a^2$ , and assume that  $\mu$  satisfies the following

$$\mu \leq \min \left\{ \frac{1}{c} \left( 1 - (1/2)^{1/4} \right), \beta^2 a^2 \right\} \quad (25)$$

Note that when  $\mu$  satisfies [\(25\)](#), then  $\mu^{3/2} \leq \beta a \mu$ , so  $\epsilon = \mu^{3/2}$ .

$$\mu \leq \frac{1}{c} \left( 1 - (1/2)^{1/4} \right) = \frac{a^2}{72} \left( 1 - (1/2)^{1/4} \right) \leq \frac{a^2}{4}$$

572

$$\epsilon/\mu = \sqrt{\mu} \leq \frac{a}{2} \quad (26)$$

573 Then

$$\begin{aligned} t_\epsilon((a - \epsilon/\mu)(1 - c\mu); \mu) &= \frac{1}{1 - c\mu} - 1 - \frac{\mu(a + \epsilon/\mu)^2}{(\mu(a^2 + 1) + (a - \epsilon/\mu)^2(1 - c\mu)^2)^2} \\ &= \frac{c\mu}{1 - c\mu} - \frac{\mu(a + \epsilon/\mu)^2}{(\mu(a^2 + 1) + (a - \epsilon/\mu)^2(1 - c\mu)^2)^2} \\ &\geq c\mu - \mu \frac{(a + \epsilon/\mu)^2}{(a - \epsilon/\mu)^4(1 - c\mu)^4} \\ &\geq c\mu - \mu \frac{(a + a/2)^2}{(a - a/2)^4(1 - c\mu)^4} \\ &= \mu \left( c - \frac{36}{a^2(1 - c\mu)^4} \right) \\ &= \mu \left( \frac{72}{a^2} - \frac{36}{a^2(1 - c\mu)^4} \right) > 0 \end{aligned}$$

574 Then we know  $(a - \epsilon/\mu)(1 - c\mu) < x_{\mu, \epsilon}^*$ . Now we can bound the distance  $\|W_{\mu_k, \epsilon_k} - W_G\|$ , it is  
575 important to note that

$$\begin{aligned} \|W_{\mu_k, \epsilon_k} - W_G\| &= \sqrt{(x_{\mu_k, \epsilon_k} - a)^2 + (y_{\mu_k, \epsilon_k})^2} \\ &\leq \max \left\{ \sqrt{(x_{\mu_k, \epsilon_k}^* - a)^2 + (y_{\mu_k, \epsilon_k}^*)^2}, \sqrt{(x_{\mu_k, \epsilon_{k-}}^* - a)^2 + (y_{\mu_k, \epsilon_k}^*)^2} \right\} \end{aligned}$$

576 We use the fact that  $x_{\mu_k, \epsilon_k}^* < x_{\mu_k, \epsilon_k} < a$ ,  $x_{\mu_k, \epsilon_k} < x_{\mu_k, \epsilon_{k-}}^*$  and  $y_{\mu_k, \epsilon_k} < y_{\mu_k, \epsilon_k}^*$ . Next, we can  
577 separately establish bounds for these two terms. Due to [\(24\)](#),  $y_{\mu_k, \epsilon_k}^* < (2\mu_k^2)^{1/3} \frac{(a + \epsilon_k/\mu_k)^{1/3}}{(a - \epsilon_k/\mu_k)^{2/3}} =$   
578  $\sqrt{\mu_{k+1}}$  and  $(a - \epsilon_k/\mu_k)(1 - c\mu_k) < x_{\mu_k, \epsilon_k}^*$

$$\sqrt{(x_{\mu_k, \epsilon_k}^* - a)^2 + (y_{\mu_k, \epsilon_k}^*)^2} \leq \sqrt{\mu_{k+1} + (a - (a - \epsilon_k/\mu_k)(1 - c\mu_k))^2}$$

579 Given that if  $x_{\mu_k, \epsilon_{k-}}^* \leq a$ , then  $\sqrt{(x_{\mu_k, \epsilon_k}^* - a)^2 + (y_{\mu_k, \epsilon_k}^*)^2} \geq \sqrt{(x_{\mu_k, \epsilon_{k-}}^* - a)^2 + (y_{\mu_k, \epsilon_k}^*)^2}$ . There-  
580 fore, if  $x_{\mu_k, \epsilon_{k-}}^* \geq a$ , we can use the fact that  $x_{\mu_k, \epsilon_{k-}}^* \leq a + \frac{\epsilon_k}{\mu_k}$ . In this case,

$$\sqrt{(x_{\mu_k, \epsilon_{k-}}^* - a)^2 + (y_{\mu_k, \epsilon_k}^*)^2} \leq \sqrt{\mu_{k+1} + (\epsilon_k/\mu_k)^2} = \sqrt{\mu_{k+1} + \mu_k} \leq \sqrt{(2 - \delta)\mu_k}$$



581 As a result, we have

$$\|W_{\mu_k, \epsilon_k} - W_G\| \leq \max\{\sqrt{\mu_{k+1} + (a - (a - \epsilon_k/\mu_k)(1 - c\mu_k))^2}, \sqrt{(2 - \delta)\mu_k}\}$$

582

$$\begin{aligned} \mu_{k+1} + (a - (a - \epsilon_k/\mu_k)(1 - c\mu_k))^2 &\leq (1 - \delta)\mu_k + (ac\mu_k + \sqrt{\mu_k} - c\mu_k^{3/2})^2 \\ &\leq (1 - \delta)\mu_k + 3(a^2c^2\mu_k^2 + \mu_k + c^2\mu_k^3) \\ &= (4 - \delta)\mu_k + 3a^2c^2\mu_k^2 + 3c^2\mu_k^3 \end{aligned}$$

583

$$\begin{aligned} \|W_{\mu_k, \epsilon_k} - W_G\| &\leq \max\{\sqrt{\mu_{k+1} + (a - (a - \epsilon_k/\mu_k)(1 - c\mu_k))^2}, \sqrt{(2 - \delta)\mu_k}\} \\ &\leq \max\{\sqrt{(4 - \delta)\mu_k + 3a^2c^2\mu_k^2 + 3c^2\mu_k^3}, \sqrt{(2 - \delta)\mu_k}\} \\ &= \sqrt{(4 - \delta)\mu_k + 3a^2c^2\mu_k^2 + 3c^2\mu_k^3} \end{aligned}$$

584 Just let

$$(4 - \delta)\mu_k \leq (4 - \delta)(1 - \delta)^k \mu_0 \leq \frac{\varepsilon_{\text{dist}}^2}{3} \Rightarrow k \geq \frac{\ln(3(4 - \delta)\mu_0/\varepsilon_{\text{dist}}^2)}{\ln(1/(1 - \delta))} \quad (27)$$

$$3a^2c^2\mu_k^2 \leq 3a^2c^2(1 - \delta)^{2k} \mu_0^2 \leq \frac{\varepsilon_{\text{dist}}^2}{3} \Rightarrow k \geq \frac{\ln(46656\mu_0^2/(a^2\varepsilon_{\text{dist}}^2))}{2\ln(1/(1 - \delta))} \quad (28)$$

$$3c^2\mu_k^3 \leq 3c^2(1 - \delta)^{3k} \mu_0^3 \leq \frac{\varepsilon_{\text{dist}}^2}{3} \Rightarrow k \geq \frac{\ln(46656\mu_0^3/(a^4\varepsilon_{\text{dist}}^2))}{3\ln(1/(1 - \delta))} \quad (29)$$

585 We use the fact that  $\mu_k \leq (1 - \delta)^k \mu_0$ . In order to satisfy (25).

$$\mu_k \leq \mu_0(1 - \delta)^k \leq \frac{a^2}{72}(1 - (1/2)^{1/4}) \Rightarrow k \geq \frac{\ln \frac{72\mu_0}{a^2(1 - (1/2)^{1/4})}}{\ln \frac{1}{1 - \delta}} \quad (30)$$

$$\mu_k \leq \mu_0(1 - \delta)^k \leq \beta^2 a^2 \Rightarrow k \geq \frac{\ln(\mu_0/(\beta^2 a^2))}{\ln \frac{1}{1 - \delta}} \quad (31)$$

586 Consequently, running Algorithm 6 after  $K(\mu_0, a, \delta, \varepsilon_{\text{dist}})$  outer iteration

$$\|W_{\mu_k, \epsilon_k} - W_G\|_2 \leq \varepsilon_{\text{dist}}$$

587 where

$$K(\mu_0, a, \delta, \varepsilon_{\text{dist}}) \geq \frac{1}{\ln(1/(1 - \delta))} \max\left\{\ln \frac{\mu_0}{\beta^2 a^2}, \ln \frac{72\mu_0}{a^2(1 - (1/2)^{1/4})}, \ln\left(\frac{3(4 - \delta)\mu_0}{\varepsilon^2}\right), \frac{1}{2} \ln\left(\frac{46656\mu_0^2}{a^2\varepsilon^2}\right), \frac{1}{3} \ln\left(\frac{46656\mu_0^3}{a^4\varepsilon^2}\right)\right\}$$

588 By Lemma 6,  $k$  iteration of Algorithm 6 need the following step of gradient descent

$$\frac{2(\mu_k(a^2 + 1) + 3a^2)(g_{\mu_{k+1}}(W_{\mu_k, \epsilon_k}) - g_{\mu_{k+1}}(W_{\mu_{k+1}, \epsilon_{k+1}}))}{\epsilon_k^2}$$

589 Let  $\widehat{K}(\mu_0, a, \delta, \varepsilon_{\text{dist}})$  satisfy  $\mu_{\widehat{K}(\mu_0, a, \delta, \varepsilon_{\text{dist}})} \leq \beta^2 a^2 < \mu_{\widehat{K}(\mu_0, a, \delta, \varepsilon_{\text{dist}})-1}$ . Hence, the total number  
 590 of gradient steps required by Algorithm 6 can be expressed as follows:

$$\begin{aligned}
& \sum_{k=0}^{K(\mu_0, a, \delta, \varepsilon_{\text{dist}})} \frac{2(\mu_k(a^2 + 1) + 3a^2)(g_{\mu_{k+1}}(W_{\mu_k, \epsilon_k}) - g_{\mu_{k+1}}(W_{\mu_{k+1}, \epsilon_{k+1}}))}{\epsilon_k^2} \\
& \leq 2(\mu_0(a^2 + 1) + 3a^2) \left( \sum_{k=0}^{\widehat{K}(\mu_0, a, \delta, \varepsilon_{\text{dist}})-1} \frac{(g_{\mu_{k+1}}(W_{\mu_k, \epsilon_k}) - g_{\mu_{k+1}}(W_{\mu_{k+1}, \epsilon_{k+1}}))}{\epsilon_k^2} + \sum_{k=\widehat{K}(\mu_0, a, \delta, \varepsilon_{\text{dist}})}^{K(\mu_0, a, \delta, \varepsilon_{\text{dist}})} \frac{(g_{\mu_{k+1}}(W_{\mu_k, \epsilon_k}) - g_{\mu_{k+1}}(W_{\mu_{k+1}, \epsilon_{k+1}}))}{\epsilon_k^2} \right) \\
& = 2(\mu_0(a^2 + 1) + 3a^2) \left( \sum_{k=0}^{\widehat{K}(\mu_0, a, \delta, \varepsilon_{\text{dist}})-1} \frac{(g_{\mu_{k+1}}(W_{\mu_k, \epsilon_k}) - g_{\mu_{k+1}}(W_{\mu_{k+1}, \epsilon_{k+1}}))}{\beta^2 a^2 \mu_k^2} + \sum_{k=\widehat{K}(\mu_0, a, \delta, \varepsilon_{\text{dist}})}^{K(\mu_0, a, \delta, \varepsilon_{\text{dist}})} \frac{(g_{\mu_{k+1}}(W_{\mu_k, \epsilon_k}) - g_{\mu_{k+1}}(W_{\mu_{k+1}, \epsilon_{k+1}}))}{\mu_k^3} \right) \\
& \leq 2(\mu_0(a^2 + 1) + 3a^2) \left( \sum_{k=0}^{\widehat{K}(\mu_0, a, \delta, \varepsilon_{\text{dist}})-1} \frac{(g_{\mu_{k+1}}(W_{\mu_k, \epsilon_k}) - g_{\mu_{k+1}}(W_{\mu_{k+1}, \epsilon_{k+1}}))}{\beta^6 a^6} + \sum_{k=\widehat{K}(\mu_0, a, \delta, \varepsilon_{\text{dist}})}^{K(\mu_0, a, \delta, \varepsilon_{\text{dist}})} \frac{(g_{\mu_{k+1}}(W_{\mu_k, \epsilon_k}) - g_{\mu_{k+1}}(W_{\mu_{k+1}, \epsilon_{k+1}}))}{\mu_k^3} \right) \\
& \leq 2(\mu_0(a^2 + 1) + 3a^2) \left( \sum_{k=0}^{K(\mu_0, a, \delta, \varepsilon_{\text{dist}})} \frac{(g_{\mu_{k+1}}(W_{\mu_k, \epsilon_k}) - g_{\mu_{k+1}}(W_{\mu_{k+1}, \epsilon_{k+1}}))}{\beta^6 a^6} + \sum_{k=0}^{K(\mu_0, a, \delta, \varepsilon_{\text{dist}})} \frac{(g_{\mu_{k+1}}(W_{\mu_k, \epsilon_k}) - g_{\mu_{k+1}}(W_{\mu_{k+1}, \epsilon_{k+1}}))}{\mu_{K(\mu_0, a, \delta, \varepsilon_{\text{dist}})}^3} \right) \\
& = 2(\mu_0(a^2 + 1) + 3a^2) \left( \frac{1}{\beta^6 a^6} + \frac{1}{\mu_{K(\mu_0, a, \delta, \varepsilon_{\text{dist}})}^3} \right) \left( \sum_{k=0}^{K(\mu_0, a, \delta, \varepsilon_{\text{dist}})} (g_{\mu_{k+1}}(W_{\mu_k, \epsilon_k}) - g_{\mu_{k+1}}(W_{\mu_{k+1}, \epsilon_{k+1}})) \right) \\
& \leq 2(\mu_0(a^2 + 1) + 3a^2) \left( \frac{1}{\beta^6 a^6} + \frac{1}{\mu_{K(\mu_0, a, \delta, \varepsilon_{\text{dist}})}^3} \right) \left( \sum_{k=0}^{K(\mu_0, a, \delta, \varepsilon_{\text{dist}})} (g_{\mu_k}(W_{\mu_k}^{\epsilon_k}) - g_{\mu_{k+1}}(W_{\mu_{k+1}}^{\epsilon_{k+1}})) \right) \\
& = 2(\mu_0(a^2 + 1) + 3a^2) \left( \frac{1}{\beta^6 a^6} + \frac{1}{\mu_{K(\mu_0, a, \delta, \varepsilon_{\text{dist}})}^3} \right) (g_{\mu_0}(W_{\mu_0, \epsilon_0}) - g_{\mu_{K(\mu_0, a, \delta, \varepsilon_{\text{dist}})+1}}(W_{\mu_{K(\mu_0, a, \delta, \varepsilon_{\text{dist}})+1}}^{\epsilon_{K(\mu_0, a, \delta, \varepsilon_{\text{dist}})+1}})) \\
& \leq 2(\mu_0(a^2 + 1) + 3a^2) \left( \frac{1}{\beta^6 a^6} + \frac{1}{\mu_{K(\mu_0, a, \delta, \varepsilon_{\text{dist}})}^3} \right) g_{\mu_0}(W_{\mu_0, \epsilon_0})
\end{aligned}$$

591 Note from (27) and (30), the following should holds

$$\mu_{K(\mu_0, a, \delta, \varepsilon_{\text{dist}})} = \min\left\{ \frac{\varepsilon_{\text{dist}}^2}{3(4-\delta)}, \frac{a\varepsilon_{\text{dist}}}{216}, \left( \frac{a\varepsilon_{\text{dist}}}{216} \right)^{2/3}, \beta^2 a^2, \frac{a^2}{72}(1 - (1/2)^{1/4}) \right\}$$

592 Therefore,

$$\begin{aligned}
& \sum_{k=0}^{K(\mu_0, a, \delta, \varepsilon_{\text{dist}})} \frac{2(\mu_k(a^2 + 1) + 3a^2)(g_{\mu_{k+1}}(W_{\mu_k, \epsilon_k}) - g_{\mu_{k+1}}(W_{\mu_{k+1}, \epsilon_{k+1}}))}{\epsilon_k^2} \\
& \leq 2(\mu_0(a^2 + 1) + 3a^2) \left( \frac{1}{\beta^6 a^6} + \left( \max\left\{ \frac{3(4-\delta)}{\varepsilon_{\text{dist}}^2}, \frac{216}{a\varepsilon_{\text{dist}}}, \left( \frac{216}{a\varepsilon_{\text{dist}}} \right)^{2/3}, \frac{1}{\beta^2 a^2}, \frac{72}{(1 - (1/2)^{1/4})a^2} \right\} \right)^3 \right) g_{\mu_0}(W_{\mu_0}^{\epsilon_0})
\end{aligned}$$

## 594 D Additional Theorems and Lemmas

595 **Theorem 5** (Detailed Property of  $r(y; \mu)$ ). *For  $r(y; \mu)$  in (8), then*

596 (i) *For  $\mu > 0$ ,  $\lim_{y \rightarrow 0^+} r(y; \mu) = \infty$ ,  $r(\frac{a}{a^2+1}, \mu) < 0$*

597 (ii) *For  $\mu > 0$ ,  $r(\sqrt{\mu}, \mu) < 0$ .*

598 (iii) *For  $\mu > \frac{a^2}{4}$*

$$\frac{dr(y; \mu)}{dy} < 0$$

*For  $0 < \mu \leq \frac{a^2}{4}$*

$$\begin{cases} \frac{dr(y; \mu)}{dy} > 0 & y_{\text{lb}} < y < y_{\text{ub}} \\ \frac{dr(y; \mu)}{dy} \leq 0 & \text{Otherwise} \end{cases} \quad (32a)$$

$$(32b)$$

599 *where*

$$y_{\text{lb}} = \frac{(4\mu)^{1/3}}{2} (a^{1/3} - \sqrt{a^{2/3} - (4\mu)^{1/3}}) \quad y_{\text{ub}} = \frac{(4\mu)^{1/3}}{2} (a^{1/3} + \sqrt{a^{2/3} - (4\mu)^{1/3}})$$

600 *Moreover,*

$$y_{\text{lb}} \leq \sqrt{\mu} \leq y_{\text{ub}}$$

601 (iv) *For  $0 < \mu < \frac{a^2}{4}$ , let  $p(\mu) = r(y_{\text{ub}}, \mu)$ , then  $p'(\mu) < 0$  and there exist a unique solution to*  
 602  *$p(\mu) = 0$ , denoted as  $\tau$ . Additionally,  $\tau < \frac{a^2}{4}$ .*

603 (v) *There exists a  $\tau > 0$  such that,  $\forall \mu > \tau$ , the equation  $r(y; \mu) = 0$  has only one solution. At*  
 604  *$\mu = \tau$ , the equation  $r(y; \mu) = 0$  has two solutions, and  $\forall \mu < \tau$ , the equation  $r(y; \mu) = 0$*   
 605 *has three solutions. Moreover,  $\mu < \frac{a^2}{4}$ .*

606 (vi)  *$\forall \mu < \tau$ , the equation  $r(y; \mu) = 0$  has three solution, i.e.  $y_{\mu}^* < y_{\mu}^{**} < y_{\mu}^{***}$ .*

$$\frac{dy_{\mu}^*}{d\mu} > 0 \quad \frac{dy_{\mu}^{**}}{d\mu} > 0 \quad \frac{dy_{\mu}^{***}}{d\mu} < 0 \text{ and } \lim_{\mu \rightarrow 0} y_{\mu}^* = 0, \lim_{\mu \rightarrow 0} y_{\mu}^{**} = 0, \lim_{\mu \rightarrow 0} y_{\mu}^{***} = \frac{a}{a^2 + 1}$$

607 *Moreover,*

$$y_{\mu}^* < y_{\text{lb}} < \sqrt{\mu} < y_{\mu}^{**} < y_{\text{ub}} < y_{\mu}^{***}$$

608 **Theorem 6** (Detailed Property of  $t(x; \mu)$ ). *For  $t(x; \mu)$  in (9), then*

609 (i) *For  $\mu > 0$ ,  $\lim_{x \rightarrow 0^+} t(x; \mu) = \infty$ ,  $t(a, \mu) < 0$*

610 (ii) *If  $\mu < \left(\frac{a(\sqrt{a^2+1}-a)}{2(a^2+1)}\right)^2$  or  $\mu > \left(\frac{a(\sqrt{a^2+1}+a)}{2(a^2+1)}\right)^2$ , then  $t(\sqrt{\mu(a^2+1)}, \mu) < 0$ .*

611 (iii) *For  $\mu > \frac{a^2}{4(a^2+1)^3}$*

$$\frac{dt(x; \mu)}{dx} < 0$$

*For  $0 < \mu \leq \frac{a^2}{4(a^2+1)^3}$*

$$\begin{cases} \frac{dt(x; \mu)}{dx} > 0 & x_{\text{lb}} < x < x_{\text{ub}} \\ \frac{dt(x; \mu)}{dx} \leq 0 & \text{Otherwise} \end{cases} \quad (33a)$$

$$(33b)$$

612

where

$$x_{\text{lb}} = \frac{(4\mu a)^{1/3}(1 - \sqrt{1 - \frac{(4\mu)^{1/3}(a^2+1)}{a^{2/3}}})}{2} \quad x_{\text{ub}} = \frac{(4\mu a)^{1/3}(1 + \sqrt{1 - \frac{(4\mu)^{1/3}(a^2+1)}{a^{2/3}}})}{2}$$

613

Moreover,

$$x_{\text{lb}} \leq \sqrt{\mu(a^2 + 1)} \leq x_{\text{ub}}$$

614

(iv) For  $0 < \mu < \frac{a^2}{4(a^2+1)^3}$  and let  $q(\mu) = t(x_{\text{lb}}, \mu)$ , then  $q'(\mu) > 0$  and there exist a unique solution to  $q(\mu) = 0$ , denoted as  $\tau$  and  $\tau < \frac{a^2}{4(a^2+1)^3} \leq \frac{1}{27}$ .

615

616

617

618

(v) There exists a  $\tau > 0$  such that,  $\forall \mu > \tau$ , the equation  $t(x; \mu) = 0$  has only one solution. At  $\mu = \tau$ , the equation  $t(x; \mu) = 0$  has two solutions, and  $\forall \mu < \tau$ , the equation  $t(x; \mu) = 0$  has three solutions. Moreover,  $\tau < \frac{a^2}{4(a^2+1)^3} \leq \frac{1}{27}$

619

(vi)  $\forall \mu < \tau$ ,  $t(x; \mu) = 0$  has three stationary points, i.e.  $x_{\mu}^{***} < x_{\mu}^{**} < x_{\mu}^*$ .

$$\frac{dx_{\mu}^*}{d\mu} < 0 \quad \frac{dx_{\mu}^{***}}{d\mu} > 0 \quad \text{and} \quad \lim_{\mu \rightarrow 0} x_{\mu}^* = a, \lim_{\mu \rightarrow 0} x_{\mu}^{**} = 0, \lim_{\mu \rightarrow 0} x_{\mu}^{***} = 0$$

620

Besides,

$$\max_{\mu \leq \tau} x_{\mu}^{**} \leq \frac{a(\sqrt{a^2+1}-a)}{2\sqrt{a^2+1}} \quad \text{and} \quad \frac{a(\sqrt{a^2+1}+a)}{2\sqrt{a^2+1}} \leq \min_{\mu > 0} x_{\mu}^*$$

621

It also implies that  $t(\frac{a(\sqrt{a^2+1}-a)}{2\sqrt{a^2+1}}; \mu) \geq 0$  and  $\max_{\mu \leq \mu_0} x_{\mu}^{**} < \min_{\mu > 0} x_{\mu}^*$

622

623

**Lemma 7.** Algorithm [I](#) with input  $f = g_{\mu}(x, y)$ ,  $\mathbf{z}_0 = (x(0), y(0))$  where  $(x(0), y(0)) \in C_{\mu 3}$  in [\(41\)](#), then  $\forall t \geq 0$ ,  $(x(t), y(t)) \in C_{\mu 3}$ . Moreover,  $\lim_{t \rightarrow \infty} (x(t), y(t)) = (x_{\mu}^*, y_{\mu}^*)$

624

**Lemma 8.** For any  $(x, y) \in C_{\mu 3}$  in [\(41\)](#), and  $(x, y) \neq (x_{\mu}^*, y_{\mu}^*)$

$$g_{\mu}(x, y) > g_{\mu}(x_{\mu}^*, y_{\mu}^*)$$

625

**Theorem 7** (Detailed Property of  $r_{\epsilon}(y; \mu)$ ). For  $r_{\epsilon}(y; \mu)$  in [\(15\)](#), then

626

(i) For  $\mu > 0, \epsilon > 0$ ,  $\lim_{y \rightarrow 0^+} r_{\epsilon}(y; \mu) = \infty$ ,  $y(\frac{a}{a^2+1}, \mu) < 0$

(ii) For  $\mu > \frac{(a-\epsilon/\mu)^4}{4(a+\epsilon/\mu)^2}$ , then  $\frac{dr_{\epsilon}(y; \mu)}{dy} < 0$ . For  $0 < \mu \leq \frac{(a-\epsilon/\mu)^4}{4(a+\epsilon/\mu)^2}$

$$\begin{cases} \frac{dr_{\epsilon}(y; \mu)}{dy} > 0 & y_{\text{lb}, \mu, \epsilon} < y < y_{\text{ub}, \mu, \epsilon} \\ \frac{dr_{\epsilon}(y; \mu)}{dy} \leq 0 & \text{Otherwise} \end{cases} \quad (34a)$$

(34b)

627

where

$$y_{\text{lb}, \mu, \epsilon} = \frac{(4\mu)^{1/3}}{2} \left( \left( \frac{(a-\epsilon/\mu)^2}{a-\epsilon/\mu} \right)^{1/3} - \sqrt{\left( \frac{(a-\epsilon/\mu)^2}{a-\epsilon/\mu} \right)^{2/3} - (4\mu)^{1/3}} \right)$$

$$y_{\text{ub}, \mu, \epsilon} = \frac{(4\mu)^{1/3}}{2} \left( \left( \frac{(a-\epsilon/\mu)^2}{a-\epsilon/\mu} \right)^{1/3} + \sqrt{\left( \frac{(a-\epsilon/\mu)^2}{a-\epsilon/\mu} \right)^{2/3} - (4\mu)^{1/3}} \right)$$

628

Also,

$$y_{\text{lb}, \mu, \epsilon} \leq (2\mu^2)^{1/3} \frac{(a+\epsilon/\mu)^{1/3}}{(a-\epsilon/\mu)^{2/3}}$$

629

$$y_{\text{lb}, \mu, \epsilon} \leq \sqrt{\mu} \leq y_{\text{ub}, \mu, \epsilon}$$

630

**Theorem 8** (Detailed Property of  $r_{\beta}(y; \mu)$ ). For  $r_{\beta}(y; \mu)$  in [\(19\)](#), then

631 (i) For  $\mu > 0, \epsilon > 0, \lim_{y \rightarrow 0^+} r_\beta(y; \mu) = \infty$

(ii) For  $\mu > \frac{a^2(1-\beta)^4}{4(1+\beta)^2}$ , then  $\frac{dr_\beta(y; \mu)}{dy} < 0$ . For  $0 < \mu \leq \frac{a^2(1-\beta)^4}{4(1+\beta)^2}$

$$\begin{cases} \frac{dr_\beta(y; \mu)}{dy} > 0 & y_{\text{lb}, \mu, \beta} < y < y_{\text{ub}, \mu, \beta} \\ \frac{dr_\beta(y; \mu)}{dy} \leq 0 & \text{Otherwise} \end{cases} \quad (35a)$$

$$\quad (35b)$$

632 where

$$y_{\text{lb}, \mu, \beta} = \frac{(4\mu)^{1/3}}{2} \left( \frac{a(1-\beta)^2}{1+\beta} \right)^{1/3} \left( 1 - \sqrt{1 - \frac{(4\mu)^{1/3}}{a^{2/3}} \left( \frac{1+\beta}{(1-\beta)^2} \right)^{2/3}} \right)$$

$$y_{\text{ub}, \mu, \beta} = \frac{(4\mu)^{1/3}}{2} \left( \frac{a(1-\beta)^2}{1+\beta} \right)^{1/3} \left( 1 + \sqrt{1 - \frac{(4\mu)^{1/3}}{a^{2/3}} \left( \frac{1+\beta}{(1-\beta)^2} \right)^{2/3}} \right)$$

633 Also,

$$y_{\text{lb}, \mu, \beta} \leq \frac{(4\mu)^{2/3} (1+\beta)^{1/3}}{2a^{1/3} (1-\beta)^{2/3}}$$

634

$$y_{\text{lb}, \mu, \beta} \leq \sqrt{\mu} \leq y_{\text{ub}, \mu, \beta}$$

635 **Theorem 9** (Detailed Property of  $t_\beta(x; \mu)$ ). For  $t_\beta(x; \mu)$  in (20), then

636 (i) For  $\mu > 0, \lim_{x \rightarrow 0^+} t_\beta(x; \mu) = \infty, t_\beta(a; \mu) < 0$

637 (ii) For  $\mu > \frac{a^2}{4(a^2+1)^3} \frac{(\beta+1)^4}{(\beta-1)^2}$

$$\frac{dt_\beta(x; \mu)}{dx} < 0$$

For  $0 < \mu \leq \frac{a^2}{4(a^2+1)^3} \frac{(\beta+1)^4}{(\beta-1)^2}$

$$\begin{cases} \frac{dt_\beta(x; \mu)}{dx} > 0 & x_{\text{lb}, \mu, \beta} < x < x_{\text{ub}, \mu, \beta} \\ \frac{dt_\beta(x; \mu)}{dx} \leq 0 & \text{Otherwise} \end{cases} \quad (36a)$$

$$\quad (36b)$$

638 where

$$x_{\text{lb}, \mu, \beta} = \frac{1}{2} \left( \frac{4a\mu(1+\beta)^2}{1-\beta} \right)^{1/3} \left( 1 - \sqrt{1 - \frac{(4\mu)^{1/3}(a^2+1)}{a^{2/3}} \left( \frac{1-\beta}{(1+\beta)^2} \right)^{2/3}} \right)$$

$$x_{\text{ub}, \mu, \beta} = \frac{1}{2} \left( \frac{4a\mu(1+\beta)^2}{1-\beta} \right)^{1/3} \left( 1 + \sqrt{1 - \frac{(4\mu)^{1/3}(a^2+1)}{a^{2/3}} \left( \frac{1-\beta}{(1+\beta)^2} \right)^{2/3}} \right)$$

639 (iii) If  $0 < \beta < \frac{\sqrt{(a^2+1)}-1}{\sqrt{(a^2+1)}+1}$ , then there exists a  $\tau_\beta > 0$  such that,  $\forall \mu > \tau_\beta$ , the equation

640  $r_\beta(x; \mu) = 0$  has only one solution. At  $\mu = \tau_\beta$ , the equation  $r_\beta(x; \mu) = 0$  has two

641 solutions, and  $\forall \mu < \tau_\beta$ , the equation  $r_\beta(x; \mu) = 0$  has three solutions. Moreover,  $\mu <$

642  $\frac{a^2}{4(a^2+1)^3} \frac{(\beta+1)^4}{(\beta-1)^2}$ .

643 (iv) If  $0 < \beta < \frac{\sqrt{(a^2+1)}-1}{\sqrt{(a^2+1)}+1}$ , then  $\forall \mu < \tau_\beta$ ,  $t_\beta(x; \mu) = 0$  has three stationary points, i.e.

644  $x_{\mu, \beta}^{***} < x_{\mu, \beta}^{**} < x_{\mu, \beta}^*$ . Besides,

$$\max_{\mu \leq \tau_\beta} x_{\mu, \beta}^{**} \leq \frac{a((1-\beta)\sqrt{a^2+1} - \sqrt{(1-\beta)^2(a^2+1) - (\beta+1)^2})}{2\sqrt{a^2+1}}$$

$$\frac{a((1-\beta)\sqrt{a^2+1} + \sqrt{(1-\beta)^2(a^2+1) - (\beta+1)^2})}{2\sqrt{a^2+1}} \leq \min_{\mu > 0} x_{\mu, \beta}^*$$

645

It implies that

$$\max_{\mu \leq \tau_\beta} x_{\mu,\beta}^{**} < \min_{\mu > 0} x_{\mu,\beta}^*$$

646 **Lemma 9.** Under the same setting as Corollary 3

$$\max_{\mu \leq \tau} x_{\mu,\epsilon}^{**} < \min_{\mu > 0} x_{\mu,\epsilon}^*$$

647 **E Technical Proofs**648 **E.1 Proof of Theorem 3**649 *Proof.* For the sake of completeness, we have included the proof here. Please note that this proof can  
650 also be found in [33].651 *Proof.* We use the fact that  $f$  is  $L$ -smooth function if and only if for any  $W, Y \in \text{dom}(f)$ 

$$f(W) \leq f(Y) + \langle \nabla f(Y), Y - W \rangle + \frac{L}{2} \|Y - W\|_2^2$$

652 Let  $W = W^{t+1}$  and  $Y = W^t$ , then using the updating rule  $W^{t+1} = W^t - \frac{1}{L} \nabla f(W^t)$ 

$$\begin{aligned} f(W^{t+1}) &\leq f(W^t) + \langle \nabla f(W^t), W^{t+1} - W^t \rangle + \frac{L}{2} \|W^{t+1} - W^t\|_2^2 \\ &= f(W^t) - \frac{1}{L} \|\nabla f(W^t)\|_2^2 + \frac{1}{2L} \|\nabla f(W^t)\|_2^2 \\ &= f(W^t) - \frac{1}{2L} \|\nabla f(W^t)\|_2^2 \end{aligned}$$

653 Therefore,

$$\min_{0 \leq t \leq n-1} \|\nabla f(W^t)\|_2^2 \leq \frac{1}{n} \sum_{t=0}^{n-1} \|\nabla f(W^t)\|_2^2 \leq \frac{2L(f(W^0) - f(W^n))}{n} \leq \frac{2L(f(W^0) - f(W^*))}{n}$$

654

$$\min_{0 \leq t \leq n-1} \|\nabla f(W^t)\|_2^2 \leq \frac{2L(f(W^0) - f(W^*))}{n} \leq \epsilon^2 \Rightarrow n \geq \frac{2L(f(W^0) - f(W^*))}{\epsilon^2}$$

655

□

656

□

657 **E.2 Proof of Theorem 5**658 *Proof.* (i) For any  $\mu > 0$ ,

$$\begin{aligned} \lim_{y \rightarrow 0^+} r(y; \mu) &= \lim_{y \rightarrow 0^+} \frac{a}{y} - \frac{a^2}{\mu} - (a^2 + 1) = \infty \\ r\left(\frac{a}{a^2 + 1}\right) &= -\frac{\mu a^2}{\left(\frac{a}{a^2 + 1}\right)^2 + \mu} < 0. \end{aligned}$$

(ii)

$$\begin{aligned} r(\sqrt{\mu}, \mu) &= \frac{a}{\sqrt{\mu}} - \frac{a^2}{4\mu} - (a^2 + 1) \\ &= -\frac{a^2}{4} \left( \frac{1}{\sqrt{\mu}} - \frac{2}{a} \right)^2 - a^2 < 0 \end{aligned}$$

(iii)

$$\begin{aligned}\frac{dr(y; \mu)}{dy} &= -\frac{a}{y^2} + \frac{4a^2\mu y}{(y^2 + \mu)^3} \\ &= \frac{4a^2\mu y^3 - a(y^2 + \mu)^3}{y^2(y^2 + \mu)^3} \\ &= \frac{a((4a\mu)^{2/3}y^2 + (4a\mu)^{1/3}y(y^2 + \mu) + (y^2 + \mu)^2)((4a\mu)^{1/3}y - y^2 - \mu)}{y^2(y^2 + \mu)^3}\end{aligned}$$

For  $\mu \geq \frac{a^2}{4}$ ,  $((4a\mu)^{1/3}y - y^2 - \mu) < 0 \Leftrightarrow \frac{dr(y; \mu)}{dy} < 0$ .  
 For  $\mu < \frac{a^2}{4}$ ,  $y_{\text{lb}} < y < y_{\text{ub}}$ ,  $((4a\mu)^{1/3}y - y^2 - \mu) > 0 \Leftrightarrow \frac{dr(y; \mu)}{dy} > 0$ . For  $\mu < \frac{a^2}{4}$ ,  
 $y < y_{\text{lb}}$  or  $y_{\text{ub}} < y$ ,  $((4a\mu)^{1/3}y - y^2 - \mu) \leq 0 \Leftrightarrow \frac{dr(y; \mu)}{dy} \leq 0$ .

Note that

$$\frac{dr(y; \mu)}{d\mu} = 0 \Leftrightarrow ((4a\mu)^{1/3}y - y^2 - \mu) = 0 \Leftrightarrow (4a\mu)^{1/3} = y + \frac{\mu}{y}$$

The intersection between line  $(4a\mu)^{1/3}$  and function  $y + \frac{\mu}{y}$  are exactly  $y_{\text{lb}}$  and  $y_{\text{ub}}$ , and  
 $y_{\text{lb}} < \sqrt{\mu} < y_{\text{ub}}$ .

(iv) Note that for  $0 < \mu < \frac{a^2}{4}$ ,

$$\frac{\partial r}{\partial \mu} = -a^2 \frac{y^2 - \mu}{(\mu + y^2)^3} \quad \text{and} \quad y_{\text{lb}} < \sqrt{\mu} < y_{\text{ub}}$$

then  $\frac{\partial r}{\partial \mu} \Big|_{y=y_{\text{ub}}} < 0$ . Let  $p(\mu) = r(y_{\text{ub}}, \mu)$ , because  $\frac{\partial r}{\partial y} \Big|_{y=y_{\text{ub}}} = 0$ , then

$$\frac{dp(\mu)}{d\mu} = \frac{dr(y_{\text{ub}}, \mu)}{d\mu} = \frac{\partial r}{\partial y} \Big|_{y=y_{\text{ub}}} \frac{dy_{\text{ub}}}{d\mu} + \frac{\partial r}{\partial \mu} \Big|_{y=y_{\text{ub}}} = \frac{\partial r}{\partial \mu} \Big|_{y=y_{\text{ub}}} < 0$$

Also note that when  $\mu = \frac{a^2}{4}$ ,  $y_{\text{ub}} = \sqrt{\mu}$ ,  $p(\mu) = r(y_{\text{ub}}, \mu) = r(\sqrt{\mu}, \mu) < 0$ , and also if  
 $\mu < \frac{a^2}{4}$ , then

$$y_{\text{ub}} < \frac{(4\mu)^{1/3}}{2} 2a^{1/3} = (4\mu a)^{1/3}$$

Thus,

$$\begin{aligned}r((4\mu a)^{1/3}, \mu) &= \frac{a}{(4\mu a)^{1/3}} - \frac{\mu a^2}{((4\mu a)^{2/3} + \mu)^2} - (a^2 + 1) \\ &= \frac{a}{(4\mu a)^{1/3}} - \frac{a^2}{(\mu)^{1/3}((4a)^{2/3} + \mu^{1/3})^2} - (a^2 + 1) \\ &> \frac{1}{\mu^{1/3}} \left( \frac{a}{(4a)^{1/3}} - \frac{a^2}{(4a)^{4/3}} \right) - (a^2 + 1)\end{aligned}$$

Because  $\frac{a}{(4a)^{1/3}} > \frac{a^2}{(4a)^{4/3}}$ , it is easy to see when  $\mu \rightarrow 0$ ,  $r((4\mu a)^{1/3}, \mu) \rightarrow \infty$ . We know  
 $r(y_{\text{ub}}, \mu) > r((4\mu a)^{1/3}, \mu) \rightarrow \infty$  as  $\mu \rightarrow 0$  because of the monotonicity of  $r(y; \mu)$  in  
 Theorem [5\(iii\)](#). Combining all of these, i.e.

$$\frac{dp(\mu)}{d\mu} < 0, \quad \lim_{\mu \rightarrow 0^+} p(\mu) = \infty, \quad p\left(\frac{a^2}{4}\right) < 0$$

There exists a  $\tau < \frac{a^2}{4}$  such that  $p(\tau) = 0$

(v) From Theorem [5\(iv\)](#), for  $\mu > \tau$ , then  $p(\mu) = r(y_{\text{ub}}, \mu) > 0$ , and for  $\mu = \tau$ , then  
 $p(\mu) = r(y_{\text{ub}}, \mu) = 0$ . For  $\mu < \tau$ , then  $p(\mu) = r(y_{\text{ub}}, \mu) < 0$ , combining Theorem  
[5\(i\)](#) [5\(iii\)](#), we get the conclusions.

676 (vi) By Theorem 5(v),  $\forall \mu < \tau$ , there exists three stationary points such that  $0 < y_\mu^* < y_{lb} <$   
 677  $\sqrt{\mu} < y_\mu^{**} < y_{ub} < y_\mu^{***}$ . Because  $\left. \frac{dr(y; \mu)}{dy} \right|_{y=y_{lb}} = \left. \frac{dr(y; \mu)}{dy} \right|_{y=y_{ub}} = 0$ , then

$$\left. \frac{dr(y; \mu)}{dy} \right|_{y=y_\mu^*} \neq 0, \quad \left. \frac{dr(y; \mu)}{dy} \right|_{y=y_\mu^{**}} \neq 0, \quad \left. \frac{dr(y; \mu)}{dy} \right|_{y=y_\mu^{***}} \neq 0$$

678 By implicit function theorem [14], for solution to equation  $r(y; \mu) = 0$ , there exists a  
 679 unique continuously differentiable function such that  $y = y(\mu)$  and satisfies  $r(y(\mu), \mu) = 0$ .  
 680 Therefore,

$$\frac{\partial r}{\partial \mu} = -a^2 \frac{y^2 - \mu}{(\mu + y^2)^3}, \quad \frac{\partial r}{\partial y} = -\frac{a}{y^2} + \frac{4a^2 \mu y}{(y^2 + \mu)^3}, \quad \frac{dy(\mu)}{d\mu} = -\frac{\partial r / \partial \mu}{\partial r / \partial y}$$

681 Therefore by Theorem 5(iii)

$$\left. \frac{dy}{d\mu} \right|_{y=y_\mu^*} > 0, \quad \left. \frac{dy}{d\mu} \right|_{y=y_\mu^{**}} > 0, \quad \left. \frac{dy}{d\mu} \right|_{y=y_\mu^{***}} < 0$$

682 Because  $\lim_{\mu \rightarrow 0^+} y_{lb} = \lim_{\mu \rightarrow 0^+} y_{ub} = 0$ , then  $\lim_{\mu \rightarrow 0^+} y_\mu^* = \lim_{\mu \rightarrow 0^+} y_\mu^{**} = 0$ . Let us  
 683 consider  $r(\frac{a}{a^2+1}(1-c\mu), \mu)$  where  $c = 32 \frac{(a^2+1)^3}{a^2}$  and  $\mu < \frac{1}{2c}$

$$\begin{aligned} & r\left(\frac{a}{a^2+1}(1-c\mu), \mu\right) \\ &= \frac{a}{\frac{a}{a^2+1}(1-c\mu)} - \frac{\mu a^2}{\left(\frac{a^2}{(a^2+1)^2}(1-c\mu)^2 + \mu\right)^2} - (a^2+1) \\ &= (a^2+1)\left(\frac{c\mu}{1-c\mu}\right) - \frac{\mu a^2}{\left(\frac{a^2}{(a^2+1)^2}(1-c\mu)^2 + \mu\right)^2} \\ &\geq c(a^2+1)\mu - \frac{\mu a^2}{\left(\frac{a^2}{(a^2+1)^2}(1-c\mu)^2\right)^2} \\ &= c(a^2+1)\mu - \frac{16(a^2+1)^4}{a^2}\mu \\ &= \frac{16(a^2+1)^4}{a^2}\mu > 0 \end{aligned}$$

684 By Theorem 5(iii), then  $\frac{a}{a^2+1}(1-c\mu) < y_\mu^{***}$ , then

$$\frac{a}{a^2+1} = \lim_{\mu \rightarrow 0^+} \frac{a}{a^2+1}(1-c\mu), \mu \leq \lim_{\mu \rightarrow 0^+} y_\mu^{***} \leq \frac{a}{a^2+1}$$

685 Consequently,

$$\lim_{\mu \rightarrow 0^+} y_\mu^{***} = \frac{a}{a^2+1}$$

686

□

### 687 E.3 Proof of Theorem 6

688 *Proof.* (i) For  $\mu > 0$ ,

$$\begin{aligned} \lim_{x \rightarrow 0^+} t(x; \mu) &= \lim_{x \rightarrow 0^+} \frac{a}{x} - \frac{a^2}{\mu(a^2+1)^2} - 1 = \infty \\ t(a, \mu) &= -\frac{\mu a^2}{(\mu(a^2+1) + a^2)^2} < 0 \end{aligned}$$

(ii)

$$t(\sqrt{\mu(a^2+1)}, \mu) = \frac{a}{\sqrt{a^2+1}} \frac{1}{\sqrt{\mu}} - \frac{a^2}{4\mu(a^2+1)^2} - 1$$



689 If  $t(\sqrt{\mu(a^2+1)}, \mu) = 0$ , then

$$\frac{1}{\sqrt{\mu}} = 2 \frac{(a^2+1)^{3/2}}{a} \pm 2(a^2+1) \Rightarrow \mu = \left( \frac{a(\sqrt{a^2+1} \mp a)}{2(a^2+1)} \right)^2$$

690 so when  $\mu < \left( \frac{a(\sqrt{a^2+1}-a)}{2(a^2+1)} \right)^2$  or  $\mu > \left( \frac{a(\sqrt{a^2+1}+a)}{2(a^2+1)} \right)^2$ , then  $t(\sqrt{\mu(a^2+1)}, \mu) < 0$

(iii)

$$\begin{aligned} & \frac{dt(x, \mu)}{dx} \\ &= -\frac{a}{x^2} + \frac{4\mu a^2 x}{(\mu(a^2+1) + x^2)^3} \\ &= \frac{4\mu a^2 x^3 - a(\mu(a^2+1) + x^2)^3}{x^2(\mu(a^2+1) + x^2)^3} \\ &= \frac{a((\mu(a^2+1) + x^2)^2 + (\mu(a^2+1) + x^2)(4\mu a)^{1/3}x + (4\mu a)^{2/3}x^2)((4\mu a)^{1/3}x - \mu(a^2+1) - x^2)}{x^2(\mu(a^2+1) + x^2)^3} \end{aligned}$$

691 For  $\mu > \frac{a^2}{4(a^2+1)^3}$ , then  $(4\mu a)^{1/3}x - \mu(a^2+1) - x^2 < 0 \Leftrightarrow \frac{dt(x, \mu)}{dx} < 0$ . For  $\mu < \frac{a^2}{4(a^2+1)^3}$ ,  
692 and  $x_{lb} < x < x_{ub}$ , then  $(4\mu a)^{1/3}x - \mu(a^2+1) - x^2 > 0 \Leftrightarrow \frac{dt(x, \mu)}{dx} > 0$ . For  $\mu < \frac{a^2}{4(a^2+1)^3}$ ,  
693  $x < x_{lb}$  or  $x > x_{ub}$ ,  $(4\mu a)^{1/3}x - \mu(a^2+1) - x^2 < 0 \Leftrightarrow \frac{dt(x, \mu)}{dx} < 0$ .

694 We use the same argument as before to show that

$$x_{lb} < \sqrt{\mu(a^2+1)} < x_{ub}$$

695 (iv) Note that for  $0 < \mu < \frac{a^2}{4(a^2+1)^3}$

$$\frac{\partial t}{\partial \mu} = -a^2 \frac{x^2 - \mu(a^2+1)}{(\mu(a^2+1) + x^2)^3} \quad \text{and} \quad x_{lb} < \sqrt{\mu(a^2+1)} < x_{ub}$$

696 then  $\frac{\partial t}{\partial \mu} \Big|_{x=x_{lb}} > 0$ . Let  $q(\mu) = t(x_{lb}, \mu)$ , because  $\frac{\partial t}{\partial x} \Big|_{x=x_{lb}} = 0$ , then

$$\frac{dq(\mu)}{d\mu} = \frac{dt(x_{lb}, \mu)}{d\mu} = \frac{\partial t}{\partial x} \Big|_{x=x_{lb}} \frac{dx_{lb}}{d\mu} + \frac{\partial t}{\partial \mu} \Big|_{x=x_{lb}} = \frac{\partial t}{\partial \mu} \Big|_{x=x_{lb}} > 0$$

697 Note that  $\mu = \frac{a^2}{4(a^2+1)^3}$ ,  $x_{ub} = x_{lb} = \frac{(4\mu a)^{1/3}}{2}$ ,  $t(\frac{(4\mu a)^{1/3}}{2}, \frac{a^2}{4(a^2+1)^3}) = \frac{a}{(4\mu a)^{1/3}} - 1 > 0$ .

698 When  $\mu < \left( \frac{a(\sqrt{a^2+1}-a)}{2(a^2+1)} \right)^2$ , then  $t(\sqrt{\mu(a^2+1)}, \mu) < 0$  by Theorem 6(ii). It implies that  
699  $q(\mu) < 0$  when  $\mu \rightarrow 0^+$ . By Theorem 6(iii),  $q(\mu) = t(x_{lb}, \mu) < t(\sqrt{\mu(a^2+1)}, \mu) < 0$ .  
700 Combining all of the theses, i.e.

$$\frac{dq(\mu)}{d\mu} > 0, \quad \lim_{\mu \rightarrow 0^+} q(\mu) < 0, \quad q\left(\frac{a^2}{4(a^2+1)^3}\right) > 0$$

701 There exists a  $\tau < \frac{a^2}{4(a^2+1)^3}$ ,  $q(\tau) = 0$ . Such  $\tau$  is the same as in Theorem 5(iv).

702 (v) We follow the same proof from the proof of Theorem 5(v).

703 (vi) By Theorem 6(v),  $\forall \mu < \mu_0$ , there exists three stationary points such that  $0 < x_{\mu}^{***} < x_{lb} <$

704  $x_{\mu}^{**} < x_{ub} < x_{\mu}^* < a$ . Because  $\frac{dt(x; \mu)}{dx} \Big|_{x=x_{lb}} = \frac{dt(x; \mu)}{dx} \Big|_{x=x_{ub}} = 0$ , then

$$\frac{dt(x; \mu)}{dx} \Big|_{x=x_{\mu}^*} \neq 0, \quad \frac{dt(x; \mu)}{dx} \Big|_{x=x_{\mu}^{**}} \neq 0, \quad \frac{dt(x; \mu)}{dx} \Big|_{x=x_{\mu}^{***}} \neq 0$$

By implicit function theorem [14], for solutions to equation  $t(x; \mu) = 0$ , there exists a unique continuously differentiable function such that  $x = x(\mu)$  and satisfies  $t(x(\mu), \mu) = 0$ . Therefore,

$$\frac{dx}{d\mu} = -\frac{\partial t / \partial \mu}{\partial t / \partial x} = a^2 \frac{\frac{x^2 - \mu(a^2 + 1)}{(\mu(a^2 + 1) + x^2)^3}}{-\frac{a}{x^2} + \frac{4\mu a^2 x}{(\mu(a^2 + 1) + x^2)^3}}$$

Therefore, by Theorem 6(iii)

$$\left. \frac{dx}{d\mu} \right|_{x=x_\mu^*} < 0 \quad \left. \frac{dx}{d\mu} \right|_{x=x_\mu^{**}} > 0$$

Because  $0 < x_\mu^{***} < x_{lb} < x_\mu^{**} < x_{ub}$  and  $\lim_{\mu \rightarrow 0^+} x_{lb} = \lim_{\mu \rightarrow 0^+} x_{ub} = 0$ .

$$\lim_{\mu \rightarrow 0} x_\mu^{**} = \lim_{\mu \rightarrow 0} x_\mu^{***} = 0$$

Let us consider  $t(a(1 - c\mu), \mu)$  where  $c = \frac{32}{a^2}$  and  $\mu < \frac{1}{2c}$

$$\begin{aligned} & t(a(1 - c\mu); \mu) \\ &= \frac{a}{a(1 - c\mu)} - \frac{\mu a^2}{(\mu(a^2 + 1) + a^2(1 - c\mu)^2)^2} - 1 \\ &= \frac{c\mu}{1 - c\mu} - \frac{\mu a^2}{(\mu(a^2 + 1) + a^2(1 - c\mu)^2)^2} \\ &\geq c\mu - \frac{\mu a^2}{(a^2(1 - c\mu)^2)^2} \\ &\geq c\mu - \frac{16}{a^2}\mu > 0 \end{aligned}$$

By Theorem 6(iii) It implies

$$a(1 - c\mu) \leq x_\mu^*$$

taking  $\mu \rightarrow 0^+$  on both side,

$$a = \lim_{\mu \rightarrow 0^+} a(1 - c\mu) \leq \lim_{\mu \rightarrow 0^+} x_\mu^* \leq a$$

Hence,  $\lim_{\mu \rightarrow 0} x_\mu^* = a$ .

When  $\mu = \tau$ , because  $t(x_{lb}; \mu) = 0$  and  $x_{ub} > \sqrt{\mu(a^2 + 1)} > x_{lb}$ ,  $t(x; \mu)$  is increasing function between  $[x_{lb}, x_{ub}]$  then  $t(\sqrt{\mu(a^2 + 1)}; \mu) > t(x_{lb}; \mu) = 0$ . Moreover,  $t(\sqrt{\mu(a^2 + 1)}; \mu)$ ,  $x_{lb}$  and  $x_\mu^{**}$  are continuous function w.r.t  $\mu$ ,  $\exists \delta > 0$  which is really small, such that  $\mu = \tau - \delta$  and  $t(\sqrt{\mu(a^2 + 1)}; \mu) > 0$ ,  $t(x_{lb}, \mu) < 0$  (by Theorem 6(iv)) and  $x_\mu^{**} > x_{lb}$ , hence  $\left. \frac{dx}{d\mu} \right|_{x=x_\mu^{**}} < 0$ . It implies when  $\mu$  decreases, then  $x_\mu^{**}$  increases. This relation holds until  $x_\mu^{**} = \sqrt{\mu(a^2 + 1)}$

$$\begin{aligned} & t(x_\mu^{**}, \mu) = t(\sqrt{\mu(a^2 + 1)}, \mu) = 0 \\ & \Rightarrow \mu = \left( \frac{a(\sqrt{a^2 + 1} - a)}{2(a^2 + 1)} \right)^2 \end{aligned}$$

and  $\sqrt{\mu(a^2 + 1)} = \frac{a(\sqrt{a^2 + 1} - a)}{2\sqrt{a^2 + 1}}$ . Note that when  $\mu < \left( \frac{a(\sqrt{a^2 + 1} - a)}{2(a^2 + 1)} \right)^2$ ,  $t(\sqrt{\mu(a^2 + 1)}, \mu) < 0$ , it implies that  $x_\mu^{**} > \sqrt{\mu(a^2 + 1)}$  and  $\left. \frac{dx}{d\mu} \right|_{x=x_\mu^{**}} > 0$ , thus decreasing  $\mu$  leads to decreasing  $x_\mu^{**}$ . We can conclude

$$\max_{\mu \leq \tau} x_\mu^{**} \leq \frac{a(\sqrt{a^2 + 1} - a)}{2\sqrt{a^2 + 1}}$$

723 Note that  $\forall \mu$  s.t.  $\left(\frac{a(\sqrt{a^2+1}-a)}{2(a^2+1)}\right)^2 < \mu < \tau$ ,  $x_\mu^{**} < \left(\frac{a(\sqrt{a^2+1}-a)}{2(a^2+1)}\right)^2$ , so  
 724  $t\left(\left(\frac{a(\sqrt{a^2+1}-a)}{2(a^2+1)}\right)^2, \mu\right) \geq 0$ .

725 Note that when  $\mu > \frac{a^2}{a^2+1}$ , i.e.  $(x_\mu^*)^2 \geq \mu(a^2+1)$  then

$$\frac{dx}{d\mu}\bigg|_{x=x_\mu^*} > 0$$

726 It implies that when  $\mu$  decreases,  $x_\mu^*$  also decreases. It holds true until  $x_\mu^* = \sqrt{\mu(a^2+1)}$ .  
 727 The same analysis can be applied to  $x_\mu^*$  like above, we can conclude that

$$\min_{\tau} x_\mu^* = \frac{a(\sqrt{a^2+1}+a)}{2\sqrt{a^2+1}}$$

728 Hence

$$\max_{\mu \leq \tau} x_\mu^{**} \leq \frac{a(\sqrt{a^2+1}-a)}{2\sqrt{a^2+1}} < \frac{a(\sqrt{a^2+1}+a)}{2\sqrt{a^2+1}} \leq \min_{\mu > 0} x_\mu^*$$

729

□

#### 730 E.4 Proof of Theorem 78 and 9

731 *Proof.* The proof is similar to the proof of Theorem 5 and Theorem 6

□

#### 732 E.5 Proof of Lemma 1

*Proof.*

$$\nabla^2 g_\mu(x, y) = \begin{pmatrix} \mu + y^2 & 2xy \\ 2xy & \mu(a^2+1) + x^2 \end{pmatrix}$$

733 Let  $\lambda_1(\nabla^2 g_\mu(x, y))$ ,  $\lambda_2(\nabla^2 g_\mu(x, y))$  be the eigenvalue of matrix  $\nabla^2 g_\mu(x, y)$ , then

$$\begin{aligned} & \lambda_1(\nabla^2 g_\mu(x, y)) + \lambda_2(\nabla^2 g_\mu(x, y)) \\ &= \text{Tr}(\nabla^2 g_\mu(x, y)) = \mu + y^2 + \mu(a^2+1) + x^2 > 0 \end{aligned}$$

734 Now we calculate the product of eigenvalue

$$\begin{aligned} & \lambda_1(\nabla^2 g_\mu(x, y)) \cdot \lambda_2(\nabla^2 g_\mu(W)) \\ &= \det(\nabla^2 g_\mu(W)) \\ &= (\mu + y^2)(\mu(a^2+1) + x^2) - 4x^2y^2 \\ &= \frac{\mu a}{x} \frac{\mu a}{y} - 4x^2y^2 > 0 \\ &\Leftrightarrow \left(\frac{a\mu}{2}\right)^{2/3} > xy \\ &\Leftrightarrow \left(\frac{a\mu}{2}\right)^{2/3} > \frac{a\mu}{y^2 + \mu} y \\ &\Leftrightarrow y + \frac{\mu}{y} > (4a\mu)^{1/3} \end{aligned}$$

735 Note that for  $(x_\mu^*, y_\mu^*)$ ,  $(x_\mu^{***}, y_\mu^{***})$ , they satisfy (11a) and (11b), this fact is used in third equality and  
 736 second “ $\Leftrightarrow$ ”. By (32b), we know  $\lambda_1(\nabla^2 g_\mu(x, y)) \cdot \lambda_2(\nabla^2 g_\mu(x, y)) > 0$  for  $(x_\mu^*, y_\mu^*)$ ,  $(x_\mu^{***}, y_\mu^{***})$ ,  
 737 and  $\lambda_1(\nabla^2 g_\mu(x, y)) \cdot \lambda_2(\nabla^2 g_\mu(x, y)) < 0$  for  $(x_\mu^{**}, y_\mu^{**})$ , then

$$\lambda_1(\nabla^2 g_\mu(x, y)) > 0, \lambda_2(\nabla^2 g_\mu(x, y)) > 0 \quad \text{for } (x_\mu^*, y_\mu^*), (x_\mu^{***}, y_\mu^{***})$$

738

$$\lambda_1(\nabla^2 g_\mu(x, y)) < 0 \text{ or } \lambda_2(\nabla^2 g_\mu(x, y)) < 0 \quad \text{for } (x_\mu^{**}, y_\mu^{**})$$

739 and

$$\nabla g_\mu(x, y) = 0$$

740 Then  $(x_\mu^*, y_\mu^*)$ ,  $(x_\mu^{***}, y_\mu^{***})$  are locally minima,  $(x_\mu^{**}, y_\mu^{**})$  is saddle point for  $g_\mu(W)$ .

□

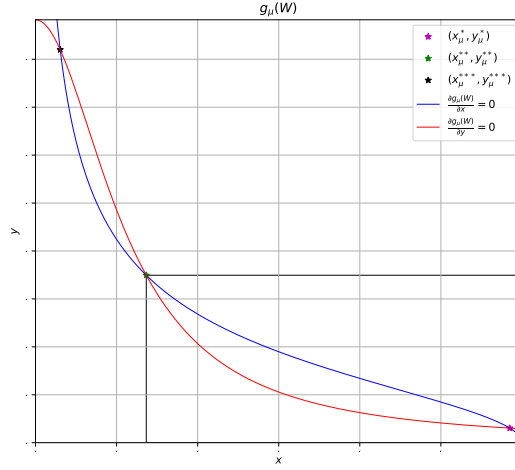

Figure 8: Stationary points when  $\mu < \tau$

*Proof.* Let us define the functions as below

$$\begin{cases} y_{\mu 1}(x) = \sqrt{\mu \left( \frac{a-x}{x} \right)} & 0 < x \leq a \\ y_{\mu 2}(x) = \frac{\mu a}{\mu(a^2 + 1) + x^2} & 0 < x \leq a \end{cases} \quad (37a)$$

$$(37b)$$

$$\begin{cases} x_{\mu 1}(y) = \frac{\mu a}{y^2 + \mu} & 0 < y < \frac{a}{a^2 + 1} \\ x_{\mu 2}(y) = \sqrt{\mu \left( \frac{a}{y} - (a^2 + 1) \right)} & 0 < y < \frac{a}{a^2 + 1} \end{cases} \quad (38a)$$

$$(38b)$$

742 with simple calculations,

$$y_{\mu 1} \geq y_{\mu 2} \Leftrightarrow t(x; \mu) \geq 0 \Leftrightarrow x \in (0, x_{\mu}^{***}] \cup [x_{\mu}^{**}, x_{\mu}^*]$$

743 and

$$x_{\mu 1} \geq x_{\mu 2} \Leftrightarrow r(y; \mu) \leq 0 \Leftrightarrow y \in [y_{\mu}^*, y_{\mu}^{**}] \cup [y_{\mu}^{***}, \frac{a}{a^2 + 1})$$

744 Here we divide  $B_{\mu}$  into three parts,  $C_{\mu 1}, C_{\mu 2}, C_{\mu 3}$

$$C_{\mu 1} = \{(x, y) | x_{\mu}^{**} < x \leq x_{\mu}^*, y_{\mu 1} < y < y_{\mu}^{**}\} \cup \{(x, y) | x_{\mu}^* < x \leq a, y_{\mu 2} < y < y_{\mu}^{**}\} \quad (39)$$

$$C_{\mu 2} = \{(x, y) | x_{\mu}^{**} < x \leq x_{\mu}^*, 0 \leq y < y_{\mu 2}\} \cup \{(x, y) | x_{\mu}^* < x \leq a, 0 \leq y < y_{\mu 1}\} \quad (40)$$

$$C_{\mu 3} = \{(x, y) | x_{\mu}^{**} < x \leq x_{\mu}^*, y_{\mu 2} \leq y \leq y_{\mu 1}\} \cup \{(x, y) | x_{\mu}^* < x \leq a, y_{\mu 1} \leq y \leq y_{\mu 2}\} \quad (41)$$

745 Also note that

$$\begin{aligned} \forall (x, y) \in C_{\mu 1} &\Rightarrow \frac{\partial g_{\mu}(x, y)}{\partial x} > 0, \frac{\partial g_{\mu}(x, y)}{\partial y} > 0 \\ \forall (x, y) \in C_{\mu 2} &\Rightarrow \frac{\partial g_{\mu}(x, y)}{\partial x} < 0, \frac{\partial g_{\mu}(x, y)}{\partial y} < 0 \end{aligned}$$

746 The gradient flow follows

$$\begin{pmatrix} x'(t) \\ y'(t) \end{pmatrix} = - \begin{pmatrix} \frac{\partial g_{\mu}(x(t), y(t))}{\partial x} \\ \frac{\partial g_{\mu}(x(t), y(t))}{\partial y} \end{pmatrix} = -\nabla g_{\mu}(x(t), y(t))$$

747 then

$$\forall (x, y) \in C_{\mu 1} \Rightarrow \begin{pmatrix} x'(t) \\ y'(t) \end{pmatrix} < 0, \quad \|\nabla g_{\mu}\| > 0 \quad (42)$$

$$\forall (x, y) \in C_{\mu 2} \Rightarrow \begin{pmatrix} x'(t) \\ y'(t) \end{pmatrix} > 0, \quad \|\nabla g_{\mu}\| > 0 \quad (43)$$

748 Note that  $\|\nabla g_{\mu}\|$  is not diminishing and bounded away from 0. Let us consider the  $(x(0), y(0)) \in$   
 749  $C_{\mu 1}$ , since  $\nabla g_{\mu}(x, y) \neq 0$ ,  $-\nabla g_{\mu}(x, y) < 0$  in (42) and boundness of  $C_{\mu 1}$ , it implies there exists a  
 750 finite  $t_0 > 0$  such that

$$(x(t_0), y(t_0)) \in \partial C_{\mu 1}, (x(t), y(t)) \in C_{\mu 1} \text{ for } 0 \leq t < t_0$$

751 where  $\partial C_{\mu 1}$  is defined as

$$\partial C_{\mu 1} = \{(x, y) | x_{\mu}^{**} < x \leq x_{\mu}^*, y = y_{\mu 1}\} \cup \{(x, y) | x_{\mu}^* < x \leq a, y = y_{\mu 2}\} \subseteq C_{\mu 3}$$

752 For the same reason, if  $(x(0), y(0)) \in C_{\mu 2}$ , there exists a finite time  $t_1 > 0$ ,

$$(x(t_0), y(t_0)) \in \partial C_{\mu 2}, (x(t), y(t)) \in C_{\mu 2} \text{ for } 0 \leq t < t_1$$

753 where  $\partial C_{\mu 2}$  is defined as

$$\partial C_{\mu 2} = \{(x, y) | x_{\mu}^{**} < x \leq x_{\mu}^*, y = y_{\mu 2}\} \cup \{(x, y) | x_{\mu}^* < x \leq a, y = y_{\mu 1}\} \subseteq C_{\mu 3}$$

754 then by lemma 7,  $\lim_{t \rightarrow \infty} (x(t), y(t)) = (x_{\mu}^*, y_{\mu}^*)$ . □

### 755 E.7 Proof of Lemma 3

756 *Proof.* This is just a result of the Theorem 5. □

### 757 E.8 Proof of Lemma 5

758 *Proof.* Note that

$$\nabla^2 g_{\mu}(W) = \begin{pmatrix} \mu + y^2 & 2xy \\ 2xy & \mu(a^2 + 1) + x^2 \end{pmatrix} = \begin{pmatrix} \mu & 0 \\ 0 & \mu(a^2 + 1) \end{pmatrix} + \begin{pmatrix} y^2 & 2xy \\ 2xy & x^2 \end{pmatrix}$$

759 Let  $\|\cdot\|_{\text{op}}$  is the spectral norm, and it satisfies triangle inequality

$$\begin{aligned} \|\nabla^2 g_{\mu}(W)\|_{\text{op}} &\leq \left\| \begin{pmatrix} \mu & 0 \\ 0 & \mu(a^2 + 1) \end{pmatrix} \right\|_{\text{op}} + \left\| \begin{pmatrix} y^2 & 2xy \\ 2xy & x^2 \end{pmatrix} \right\|_{\text{op}} \\ &= \mu(a^2 + 1) + \left\| \begin{pmatrix} y^2 & 2xy \\ 2xy & x^2 \end{pmatrix} \right\|_{\text{op}} \end{aligned}$$

760 The spectral norm of the second term in area A is bounded by

$$\max_{(x, y) \in A} \frac{(x^2 + y^2) + \sqrt{(x^2 + y^2)^2 + 12x^2y^2}}{2} \leq \frac{2a^2 + \sqrt{4a^4 + 12a^4}}{2} = 3a^2$$

761 We use  $x^2 \leq a^2, y^2 \leq a^2$  in the inequality. Therefore,

$$\|\nabla^2 g_{\mu}(W)\|_{\text{op}} \leq 3a^2 + \mu(a^2 + 1)$$

762 Also, according to [5, 33], for any  $f$ , if  $\nabla^2 f$  exists, then  $f$  is  $L$  smooth if and only if  $|\nabla^2 f|_{\text{op}} \leq L$ .

763 With this, we conclude the proof. □

### 764 E.9 Proof of Lemma 7

765 *Proof.* First we prove  $\forall t \geq 0, (x(t), y(t)) \in C_{\mu 3}$ , because if  $(x(t), y(t)) \notin C_{\mu 3}$ , then there exists a  
 766 finite  $t$  such that

$$(x(t), y(t)) \in \partial C_{\mu 3}$$

767 where  $\partial C_{\mu 3}$  is the boundary of  $C_{\mu 3}$ , defined as

$$\partial C_{\mu 3} = \{(x, y) | y = y_{\mu 1}(x) \text{ or } y = y_{\mu 2}(x), x_{\mu}^{**} < x \leq a\}$$

W.L.O.G, let us assume  $(x(0), y(0)) \in \partial C_{\mu 3}$  and  $(x(0), y(0)) \neq (x_\mu^*, y_\mu^*)$ . Here are four different cases,

$$\nabla g_\mu(x(t), y(t)) = \begin{cases} \begin{pmatrix} = 0 \\ > 0 \end{pmatrix} & \text{if } y(0) = y_{\mu 1}(x(0)), x_\mu^{**} < x(0) < x_\mu^* \\ \begin{pmatrix} = 0 \\ < 0 \end{pmatrix} & \text{if } y(0) = y_{\mu 1}(x(0)), x_\mu^* < x(0) \leq a \\ \begin{pmatrix} < 0 \\ = 0 \end{pmatrix} & \text{if } y(0) = y_{\mu 2}(x(0)), x_\mu^{**} < x(0) < x_\mu^* \\ \begin{pmatrix} > 0 \\ = 0 \end{pmatrix} & \text{if } y(0) = y_{\mu 2}(x(0)), x_\mu^* < x(0) \leq a \end{cases}$$

This indicates that  $-\nabla g_\mu(x(t), y(t))$  are pointing to the interior of  $C_{\mu 3}$ , then  $(x(t), y(t))$  can not escape  $C_{\mu 3}$ . Here we can focus our attention in  $C_{\mu 3}$ , because  $\forall t \geq 0, (x(t), y(t)) \in C_{\mu 3}$ . For Algorithm 1,

$$\frac{df(z_t)}{dt} = \nabla f(z_t) \dot{z}_t = -\|\nabla f(z_t)\|_2^2$$

In our setting,  $\forall (x, y) \in C_{\mu 3}$

$$\begin{cases} \nabla g_\mu(x, y) \neq 0 & (x, y) \neq (x_\mu^*, y_\mu^*) \\ \nabla g_\mu(x, y) = 0 & (x, y) = (x_\mu^*, y_\mu^*) \end{cases}$$

so

$$\frac{dg_\mu(x(t), y(t))}{dt} = \begin{cases} -\|\nabla g_\mu\|_2^2 < 0 & (x, y) \neq (x_\mu^*, y_\mu^*) \\ -\|\nabla g_\mu\|_2^2 = 0 & (x, y) = (x_\mu^*, y_\mu^*) \end{cases}$$

Plus,  $(x_\mu^*, y_\mu^*)$  is the unique stationary point of  $g_\mu(W)$  in  $C_{\mu 3}$ . By lemma 8

$$g_\mu(x, y) > g_\mu(x_\mu^*, y_\mu^*) \quad (x, y) \neq (x_\mu^*, y_\mu^*)$$

By Lyapunov asymptotic stability theorem [28], and applying it to gradient flow for  $g_\mu(x, y)$  in  $C_{\mu 3}$ , we can conclude  $\lim_{t \rightarrow \infty} (x(t), y(t)) = (x_\mu^*, y_\mu^*)$ .  $\square$

## E.10 Proof of Lemma 8

*Proof.* For any  $(x, y) \in C_{\mu 3}$  in 41 and  $(x, y) \neq (x_\mu^*, y_\mu^*)$ , in Algorithm 7, W.L.O.G, we can assume  $x \in (x_\mu^{**}, x_\mu^*)$ , the analysis details can also be applied to  $x \in (x_\mu^*, a)$ . It is obvious that  $\tilde{x}_j < \tilde{x}_{j+1}$  and  $\tilde{y}_{j+1} < \tilde{y}_j$ . Also,  $\lim_{j \rightarrow \infty} (\tilde{x}_j, \tilde{y}_j) = (x_\mu^*, y_\mu^*)$ . Otherwise either  $\tilde{x}_j \neq x_\mu^*$  or  $\tilde{y}_j \neq y_\mu^*$  hold, Algorithm 7 continues until  $\lim_{j \rightarrow \infty} (\tilde{x}_j, \tilde{y}_j) = \lim_{j \rightarrow \infty} (y_{\mu 2}(\tilde{y}_j), x_{\mu 1}(\tilde{x}_j))$ , i.e.  $(\tilde{x}_j, \tilde{y}_j)$  converges to  $(x_\mu^*, y_\mu^*)$ .

Moreover, note that for any  $j = 0, 1, \dots$

$$g_\mu(\tilde{x}_{j-1}, \tilde{y}_{j-1}) > g_\mu(\tilde{x}_{j-1}, \tilde{y}_j) > g_\mu(\tilde{x}_j, \tilde{y}_j)$$

Because

$$g_\mu(\tilde{x}_{j-1}, \tilde{y}_{j-1}) - g_\mu(\tilde{x}_{j-1}, \tilde{y}_j) = \frac{\partial g_\mu(\tilde{x}_{j-1}, \tilde{y})}{\partial y} (\tilde{y}_{j-1} - \tilde{y}_j) \quad \text{where } \tilde{y} \in (\tilde{y}_j, \tilde{y}_{j-1})$$

Note that

$$\frac{\partial g_\mu(\tilde{x}_{j-1}, \tilde{y})}{\partial y} > 0 \Rightarrow g_\mu(\tilde{x}_{j-1}, \tilde{y}_{j-1}) > g_\mu(\tilde{x}_{j-1}, \tilde{y}_j)$$

By the same reason,

$$g_\mu(\tilde{x}_{j-1}, \tilde{y}_j) > g_\mu(\tilde{x}_j, \tilde{y}_j)$$

By Lemma 1,  $(x_\mu^*, y_\mu^*)$  is local minima, and there exists a  $r_\mu > 0$  and any  $\{(x, y) \mid \|(x, y) - (x_\mu^*, y_\mu^*)\|_2 \leq r_\mu\}$ ,  $g_\mu(x, y) > g_\mu(x_\mu^*, y_\mu^*)$ . Since  $\lim_{j \rightarrow \infty} (\tilde{x}_j, \tilde{y}_j) = (x_\mu^*, y_\mu^*)$ , there exists a  $J > 0$  such that  $\forall j > J$ ,  $\|(\tilde{x}_j, \tilde{y}_j) - (x_\mu^*, y_\mu^*)\|_2 \leq r_\mu$ , combining them all

$$g_\mu(x, y) > g_\mu(\tilde{x}_j, \tilde{y}_j) > g_\mu(x_\mu^*, y_\mu^*)$$

791

792  $\square$

---

**Algorithm 7:** Path goes to  $(x_\mu^*, y_\mu^*)$ 


---

**Input:**  $(x, y) \in C_{\mu 3}, x_{\mu 1}(y), y_{\mu 2}(x)$  as (38a), (37b)

**Output:**  $\{(\tilde{x}_j, \tilde{y}_j)\}_{j=0}^\infty$

```

1  $(\tilde{x}_0, \tilde{y}_0) \leftarrow (x, y)$ 
2 for  $j = 1, 2, \dots$  do
3    $\tilde{y}_j \leftarrow y_{\mu 2}(\tilde{x}_{j-1})$ 
4    $\tilde{x}_j \leftarrow x_{\mu 1}(\tilde{y}_{j-1})$ 
5 end

```

---

### 793 E.11 Proof of Lemma 4

794 *Proof.* From the proof of Theorem 1, any any scheduling for  $\mu_k$  satisfies following will do the job

$$(2/a)^{2/3} \mu_{k-1}^{4/3} \leq \mu_k < \mu_{k-1}$$

795 Note that in Algorithm 4, we have  $\hat{a} = \sqrt{4(\mu_0 + \varepsilon)} < a$ , then it is obvious

$$(2/a)^{2/3} \mu_{k-1}^{4/3} < (2/\hat{a})^{2/3} \mu_{k-1}^{4/3}$$

796 The same analysis for Theorem 1 can be applied here. □

### 797 E.12 Proof of Lemma 6

798 *Proof.* By the Theorem 3 and Lemma 5 and the fact that  $A_{\mu, \epsilon}^1$  is  $\mu$ -stationary point region, we use the  
 799 same argument as proof of Lemma 7 to demonstrate the gradient descent will never go to  $A_{\mu, \epsilon}^2$ . □

### 800 E.13 Proof of Lemma 9

801 *Proof.* By Theorem 9(iv)

$$\max_{\mu \leq \tau_\beta} x_{\mu, \beta}^{**} \leq \min_{\mu > 0} x_{\mu, \beta}^*$$

802 We also know from the proof of Corollary 3,  $x_{\mu, \epsilon}^{**} < x_{\mu, \beta}^{**}$  and  $x_{\mu, \beta}^* < x_{\mu, \epsilon}^*$ . Consequently,

$$\max_{\mu \leq \tau_\beta} x_{\mu, \epsilon}^{**} \leq \min_{\mu > 0} x_{\mu, \epsilon}^*$$

803 Because  $\tau_\beta > \tau$ , so

$$\max_{\mu \leq \tau} x_{\mu, \epsilon}^{**} \leq \max_{\mu \leq \tau_\beta} x_{\mu, \epsilon}^{**} \leq \min_{\mu > 0} x_{\mu, \epsilon}^*$$

804 □

### 805 E.14 Proof of Corollary 1

806 *Proof.* Note that

$$\frac{a^2}{4(a^2 + 1)^3} \leq \frac{1}{27} \quad a > 0$$

807 when  $a > \sqrt{\frac{5}{27}}$ , then  $\frac{a^2}{4} > \mu_0 = \frac{1}{27} \geq \frac{a^2}{4(a^2 + 1)^3}$ , it satisfies condition in Lemma 4, we obtain the  
 808 same result. □

### 809 E.15 Proof of Corollary 2

810 *Proof.* Use Theorem 5(vi) and Theorem 6(vi). □

## 811 E.16 Proof of Corollary 3

812 *Proof.* It is easy to know that

$$r_\beta(y; \mu) > r_\epsilon(y; \mu) > r(y; \mu)$$

813 and

$$t_\beta(x; \mu) < t_\epsilon(x; \mu) < t(x; \mu)$$

814 and when  $\mu < \tau$ , there are three solutions to  $r(y; \mu) = 0$  by Theorem 5. Also, we know from  
815 Theorem 7, 8

$$\lim_{y \rightarrow 0^+} r_\epsilon(y; \mu) = \infty \quad \lim_{y \rightarrow 0^+} r_\beta(y; \mu) = \infty$$

816 Note that when  $\left(\frac{1+\beta}{1-\beta}\right)^2 \leq a^2 + 1$

$$r_\beta(\sqrt{\mu}; \mu) = \frac{a(1+\beta)}{\sqrt{\mu}} - (a^2 + 1) - \frac{a^2(1-\beta)^2}{4\mu} \leq 0 \quad \forall \mu > 0$$

817 Therefore,

$$0 \geq r_\beta(\sqrt{\mu}; \mu) > r_\epsilon(\sqrt{\mu}; \mu) > r(\sqrt{\mu}; \mu)$$

818 Also, we know that for  $y_{\text{ub}}$  defined in Theorem 5(iii), we know  $r(y_{\text{ub}}; \mu) > 0$  from Theorem 5(iv).  
819 Therefore,

$$r_\beta(y_{\text{ub}}; \mu) > r_\epsilon(y_{\text{ub}}; \mu) > r(y_{\text{ub}}; \mu) > 0$$

820 Besides,  $\sqrt{\mu} < y_{\text{ub}}$ . By monotonicity of  $r_\beta(y; \mu)$  and  $r_\epsilon(y; \mu)$  from the Theorem 7(ii) and Theorem  
821 8(ii), it implies that there are at least two solutions to  $r_\beta(y; \mu)$  and  $r_\epsilon(y; \mu)$ . From the geometry  
822 of  $r_\beta(y; \mu), r_\epsilon(y; \mu), r(y; \mu)$  and  $t_\beta(x; \mu), t_\epsilon(x; \mu), t(x; \mu)$ , it is trivial to know that  $x_{\mu, \epsilon}^* \leq x_\mu^*$ ,  
823  $y_{\mu, \epsilon}^* \geq y_\mu^*, x_{\mu, \epsilon}^{**} \geq x_\mu^{**}, y_{\mu, \epsilon}^* \leq y_\mu^{**}$ .

824 Finally, for every point  $(x, y) \in A_{\mu, \epsilon}^1$ , there exists a pair  $\epsilon_1, \epsilon_2$ , each satisfying  $|\epsilon_1| \leq \epsilon$  and  $|\epsilon_2| \leq \epsilon$ ,  
825 such that  $(x, y)$  is the solution to

$$x = \frac{\mu a + \epsilon_1}{\mu + y^2} \quad y = \frac{\mu a + \epsilon_2}{x^2 + \mu(a^2 + 1)}$$

826 We can repeat the same analysis above to show that  $x_{\mu, \epsilon}^* \leq x, y_{\mu, \epsilon}^* \geq y$ . Applying the same logic  
827 to  $\forall (x, y) \in A_{\mu, \epsilon}^2$ , we find  $x_{\mu, \epsilon}^{**} \geq x, y_{\mu, \epsilon}^* \leq y$ . Thus,  $(x_\mu^*, y_\mu^*)$  is the extreme point of  $A_{\mu, \epsilon}^1$  and  
828  $(x_\mu^{**}, y_\mu^{**})$  is the extreme point of  $A_{\mu, \epsilon}^2$ , we get the results.  $\square$

## 829 F Experiments Details

830 In this section, we present experiments to validate the global convergence of Algorithm 6. Our  
831 goal is twofold: First, we aim to demonstrate that irrespective of the starting point, Algorithm 6  
832 using gradient descent consistently returns the global minimum. Second, we contrast our updating  
833 scheme for  $\mu_k, \epsilon_k$  as prescribed in Algorithm 6 with an arbitrary updating scheme for  $\mu_k, \epsilon_k$ . This  
834 comparison illustrates how inappropriate setting of parameters in gradient descent could lead to  
835 incorrect solutions.



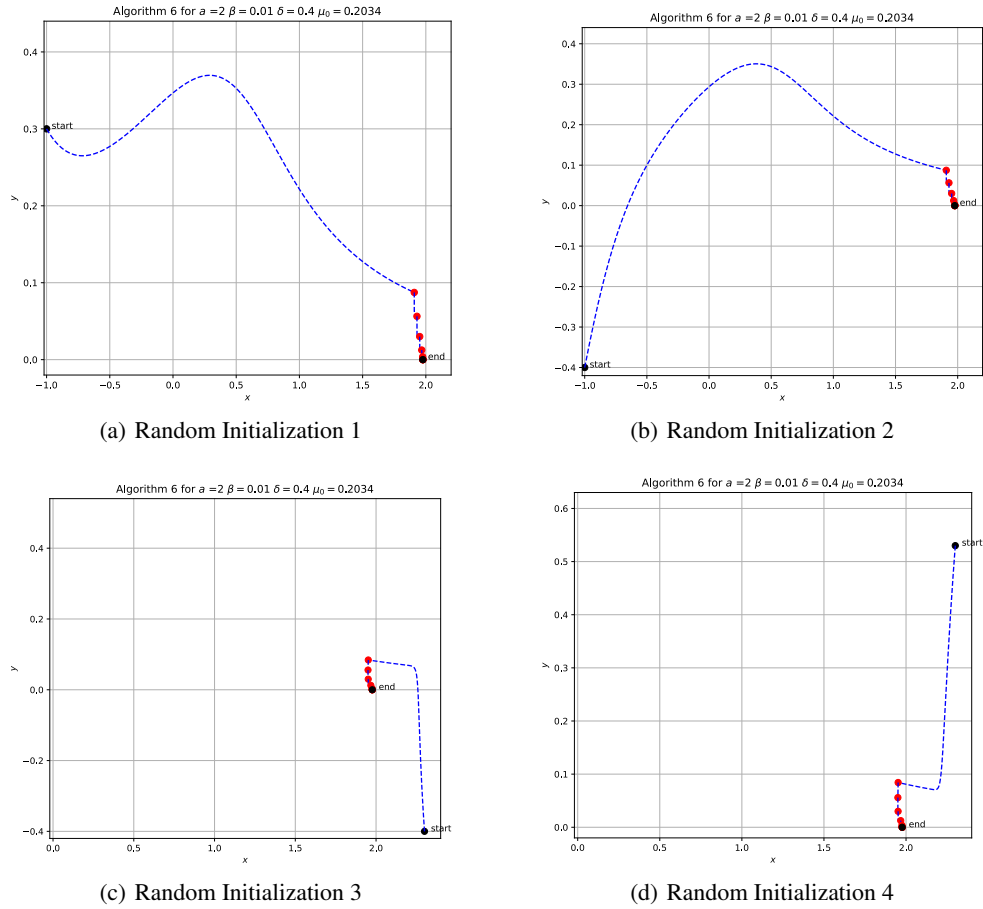

Figure 9: Trajectory of the gradient descent path with the different initializations for  $a = 2$ . We observe that regardless of the initialization, Algorithm 6 always converges to the global minimum. Initial  $\mu_0 = \frac{a^2 (1-\delta)^3 (1-\beta)^4}{4(1+\beta)^2}$

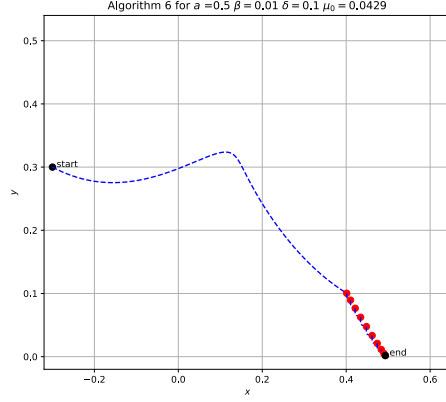

(a) Random Initialization 1

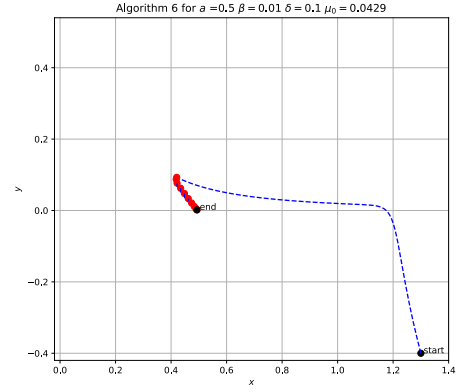

(b) Random Initialization 2

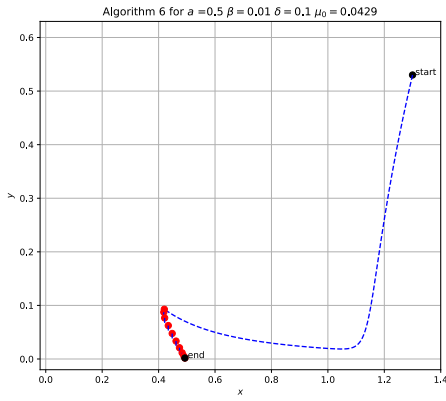

(c) Random Initialization 3

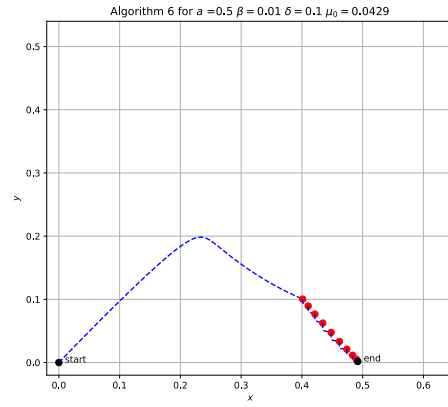

(d) Random Initialization 4

Figure 10: Trajectory of the gradient descent path with the different initializations for  $a = 0.5$ . We observe that regardless of the initialization, Algorithm 6 always converges to the global minimum.

Initial  $\mu_0 = \frac{a^2}{4} \frac{(1-\delta)^3(1-\beta)^4}{(1+\beta)^2}$

837 **F.2 Wrong Specification of  $\delta$  Leads to Spurious Local Optimal**

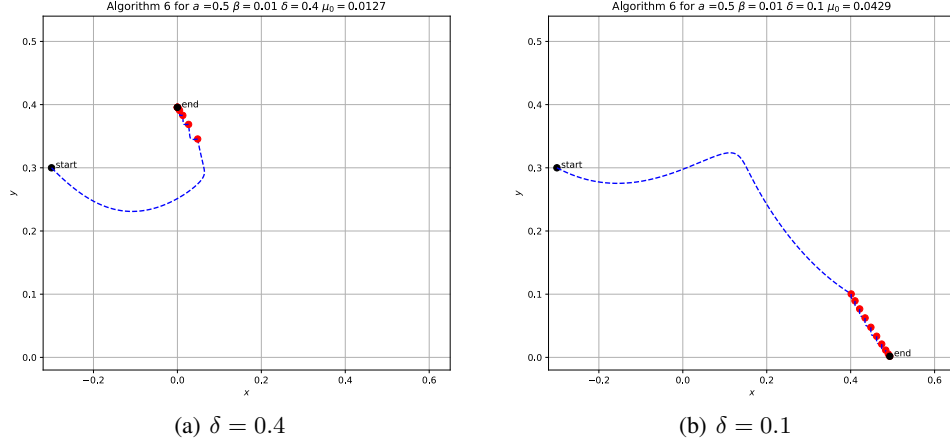

Figure 11: Trajectory of the gradient descent path for two difference  $\delta$ . Left:  $\beta$  violates requirement  $\left(\frac{1+\beta}{1-\beta}\right)^2 \leq (1-\delta)(a^2+1)$  in Theorem 4, leading to spurious local minimum. Right:  $\beta$  follows requirement  $\left(\frac{1+\beta}{1-\beta}\right)^2 \leq (1-\delta)(a^2+1)$  in Theorem 4, leading to global minimum. Initial  $\mu_0 = \frac{a^2}{4} \frac{(1-\delta)^3(1-\beta)^4}{(1+\beta)^2}$

838 **F.3 Wrong Specification of  $\beta$  Leads to Incorrect Solution**

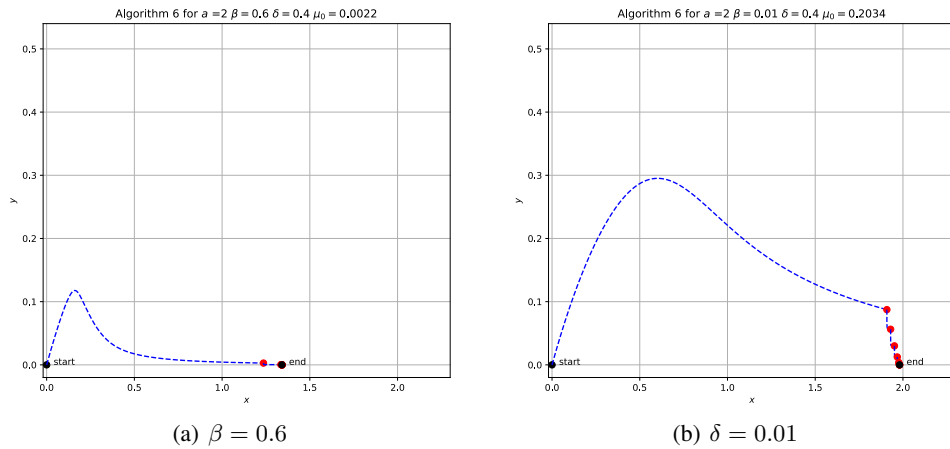

Figure 12: Trajectory of the gradient descent path for two difference  $\beta$ . Left:  $\beta$  violates requirement  $\left(\frac{1+\beta}{1-\beta}\right)^2 \leq (1-\delta)(a^2+1)$  in Theorem 4, leading to incorrect solution. Right:  $\beta$  follows requirement  $\left(\frac{1+\beta}{1-\beta}\right)^2 \leq (1-\delta)(a^2+1)$  in Theorem 4, leading to global minimum. Initial  $\mu_0 = \frac{a^2}{4} \frac{(1-\delta)^3(1-\beta)^4}{(1+\beta)^2}$

839 **F.4 Faster decrease of  $\mu_k$  Leads to Incorrect Solution**

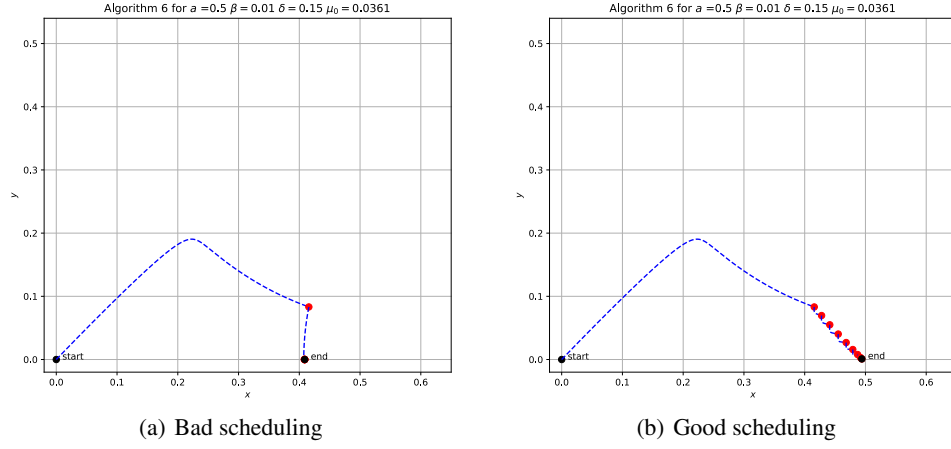

Figure 13: Trajectory of the gradient descent path for two difference update rules for  $\mu_k$  with the same initialization. Left: “Bad scheduling” uses a faster-decreasing scheme for  $\mu_k$ , leading to an incorrect solution, even a non-local optimal solution. Right: “Good scheduling” follows updating rule for  $\mu_k$  in Algorithm 6, leading to the global minimum. Initial  $\mu_0 = \frac{a^2}{4} \frac{(1-\delta)^3(1-\beta)^4}{(1+\beta)^2}$
